# 1      **Nucleosomes and DNA methylation shape meiotic DSB frequency** 2                    **in Arabidopsis transposons and gene regulatory regions**

3  
4      Kyuha Choi<sup>1</sup>†, Xiaohui Zhao<sup>1</sup>, Christophe Lambing<sup>1</sup>, Charles J. Underwood<sup>1,2</sup>, Thomas J.  
5      Hardcastle<sup>1</sup>, Heïdi Serra<sup>1</sup>, Andrew J. Tock<sup>1</sup>, Piotr A. Ziolkowski<sup>1</sup>, Nataliya E. Yelina<sup>1</sup>, Robert  
6      A. Martienssen<sup>2</sup> and Ian R. Henderson<sup>1\*</sup>

7  
8      <sup>1</sup> Department of Plant Sciences, University of Cambridge, Cambridge, Cambridgeshire, CB2  
9      3EA, United Kingdom.

10     <sup>2</sup> Howard Hughes Medical Institute-Gordon and Betty Moore Foundation, Watson School of  
11     Biological Sciences, Cold Spring Harbor Laboratory, Cold Spring Harbor, New York, USA.

## 12 13     **Corresponding Author**

14     \* Ian R. Henderson ([irh25@cam.ac.uk](mailto:irh25@cam.ac.uk) )

15  
16     † Current address: Department of Life Sciences, Pohang University of Science and  
17     Technology, Pohang, Gyeongbuk, 37673, Republic of Korea.

## 18 19     **Keywords**

20     Meiosis, recombination, DSB, hotspot, SPO11-1, crossover, nucleosomes, DNA methylation,  
21     H3K4<sup>me3</sup>, transposons.

22

23

24

25

26 **Abstract**

27 Meiotic recombination initiates via DNA double strand breaks (DSBs) generated by SPO11  
28 topoisomerase-like complexes. Recombination frequency varies extensively along eukaryotic  
29 chromosomes, with hotspots controlled by chromatin and DNA sequence. To map meiotic  
30 DSBs throughout a plant genome, we purified and sequenced Arabidopsis SPO11-1-  
31 oligonucleotides. DSB hotspots occurred in gene promoters, terminators and introns, driven  
32 by AT-sequence richness, which excludes nucleosomes and allows SPO11-1 access. A  
33 strong positive relationship was observed between SPO11-1 DSBs and final crossover  
34 levels. Euchromatic marks promote recombination in fungi and mammals, and consistently  
35 we observe H3K4<sup>me3</sup> enrichment in proximity to DSB hotspots at gene 5'-ends. Repetitive  
36 transposons are thought to be recombination-silenced during meiosis, in order to prevent  
37 non-allelic interactions and genome instability. Unexpectedly, we found strong DSB hotspots  
38 in nucleosome-depleted Helitron/Pogo/Tc1/Mariner DNA transposons, whereas  
39 retrotransposons were coldspots. Hotspot transposons are enriched within gene regulatory  
40 regions and in proximity to immunity genes, suggesting a role as recombination-enhancers.  
41 As transposon mobility in plant genomes is restricted by DNA methylation, we used the *met1*  
42 DNA methyltransferase mutant to investigate the role of heterochromatin on the DSB  
43 landscape. Epigenetic activation of transposon meiotic DSBs occurred in *met1* mutants,  
44 coincident with reduced nucleosome occupancy, gain of transcription and H3K4<sup>me3</sup>.  
45 Increased *met1* SPO11-1 DSBs occurred most strongly within centromeres and Gypsy and  
46 CACTA/EnSpm coldspot transposons. Together, our work reveals complex interactions  
47 between chromatin and meiotic DSBs within genes and transposons, with significance for the  
48 diversity and evolution of plant genomes.

49

50

51

52 **Introduction**

53 Sexual eukaryotes reproduce via fusion of haploid gametes, which are produced by the  
54 specialized meiotic cell division. During meiosis a single round of DNA replication is coupled  
55 to two rounds of chromosome segregation. Additionally, during prophase of the first meiotic  
56 division, homologous chromosomes pair and recombine, which can result in reciprocal  
57 crossovers (Kauppi et al. 2004; Villeneuve and Hillers 2001). As a consequence of  
58 recombination and independent chromosome segregation, meiosis has a major effect on  
59 genetic variation within populations and the process of evolutionary adaptation (Barton and  
60 Charlesworth 1998; Hamilton 2002).

61

62 Meiotic recombination initiates via formation of DNA double strand breaks (DSBs), which can  
63 be repaired using a homologous chromosome to produce crossover or non-crossover  
64 products (Kauppi et al. 2004; Baudat et al. 2013; Villeneuve and Hillers 2001; Szostak et al.  
65 1983). Meiotic DSBs are universally generated by SPO11 topoisomerase-like  
66 transterases, which act as dimers to cleave opposite phosphodiester backbones using  
67 catalytic tyrosine residues (Neale et al. 2005; Keeney and Kleckner 1995; Pan et al. 2011;  
68 Keeney et al. 1997). In plants, SPO11-1 and SPO11-2 interact with MEIOTIC  
69 TOPOISOMERASE VIB (MTOPIVIB), which forms a conserved catalytic core complex  
70 (Robert et al. 2016; Vrielynck et al. 2016; Hartung et al. 2007; Grelon et al. 2001). Following  
71 phosphodiester cleavage the SPO11 catalytic tyrosine remains covalently bound to the target  
72 site 5'-end (Neale et al. 2005; Keeney and Kleckner 1995; Pan et al. 2011). Endonucleases,  
73 including Sae2 and Mre11, then generate additional DNA backbone cuts 3' to the DSB site  
74 that together with exonucleases, cause release of SPO11-oligonucleotide complexes (Garcia  
75 et al. 2011; Lam and Keeney 2014; Neale et al. 2005). Purification and sequencing of  
76 SPO11-oligonucleotides, which are typically ~20–40 bases in length, has provided a high-

77 resolution method to profile meiotic DSB patterns genome-wide in fungi and mammals (Pan  
78 et al. 2011; Lange et al. 2016; Fowler et al. 2014).

79

80 Meiotic DSB and crossover frequency vary extensively along eukaryotic chromosomes and  
81 typically concentrate in ~1–2 kilobase hotspots (Baudat et al. 2013; Kauppi et al. 2004; Choi  
82 and Henderson 2015). Genetic and epigenetic information make varying contributions to  
83 control of hotspot locations and activities in different eukaryotic lineages (Baudat et al. 2013;  
84 Kauppi et al. 2004; Choi and Henderson 2015). For example, budding yeast DSB hotspots  
85 form predominantly in nucleosome-depleted regions in gene promoters and rarely in exons  
86 and terminators (Pan et al. 2011; Lam and Keeney 2015; Wu and Lichten 1994; Fan and  
87 Petes 1996). Local base composition, higher-order chromosome structure, transcription  
88 factor binding and ATM/ATR kinase signaling have further been shown to modify budding  
89 yeast DSB frequency (Lam and Keeney 2014; de Massy 2013; Cooper et al. 2016;  
90 Székvölgyi et al. 2015).

91

92 In contrast to budding yeast, mouse SPO11-oligonucleotides form at specific C-rich DNA  
93 sequence motifs that are bound by the meiotic protein PRDM9, which possesses a zinc  
94 finger array and a SET domain that catalyzes histone H3K4<sup>me3</sup> and H3K36<sup>me3</sup> (Lange et al.  
95 2016; Mihola et al. 2009; Parvanov et al. 2010; Myers et al. 2010; Baudat et al. 2010; Grey et  
96 al. 2011; Brick et al. 2012; Grey et al. 2017; Powers et al. 2016). PRDM9-dependent SPO11  
97 hotspots tend to show well-positioned flanking nucleosomes, which acquire H3K4<sup>me3</sup> and  
98 H3K36<sup>me3</sup> during meiosis (Grey et al. 2017; Baker et al. 2014; Lange et al. 2016; Brick et al.  
99 2012; Powers et al. 2016). However, H3K4<sup>me3</sup> levels do not correlate strongly with mouse or  
100 yeast SPO11-oligonucleotide levels, implying a downstream role for this chromatin mark  
101 (Tischfield and Keeney 2012; Lange et al. 2016). For example, budding yeast H3K4<sup>me3</sup> is  
102 bound by the Spp1 COMPASS complex subunit, which simultaneously interacts with meiotic

103 chromosome axis protein Mer3 and tethers chromatin loops to repair sites (Sommermeyer et  
104 al. 2013; Borde et al. 2009; Acquaviva et al. 2013). Furthermore, the mouse COMPASS  
105 subunit CXXC1 interacts with both PRDM9 and the IHO1 axis proteins, suggesting a  
106 conserved mechanism of chromatin loop-tethering during DSB repair (Imai et al. 2017).

107 Plant crossovers are enriched in euchromatin at the chromosome scale, and in proximity to  
108 gene promoters and terminators at the fine scale (Choi et al. 2013; Shilo et al. 2015;  
109 Drouaud et al. 2013; Wijnker et al. 2013; Horton et al. 2012; Hellsten et al. 2013; Fu et al.  
110 2002; Choulet et al. 2014). Crossovers in plant genomes show positive associations with  
111 H3K4<sup>me3</sup>, histone variant H2A.Z (Choi et al. 2013; Wijnker et al. 2013; Shilo et al. 2015;  
112 Drouaud et al. 2013; Liu et al. 2009), A-rich and CTT/CNN-repeat DNA sequence motifs  
113 (Shilo et al. 2015; Choi et al. 2013; Wijnker et al. 2013), and can be directly suppressed by  
114 acquisition of heterochromatic modifications, such as DNA methylation and H3K9<sup>me2</sup> (Yelina  
115 et al. 2015). However, genome-wide meiotic DSB patterns and their relation to chromatin,  
116 DNA sequence and crossover frequency have yet to be reported in a plant genome.

117

118 Despite deep conservation of core meiotic factors, such as SPO11, many aspects of genome  
119 architecture, chromatin and recombination vary between eukaryotes. For example, budding  
120 yeast possesses point centromeres, whereas large, regional centromeres surrounded by  
121 repetitive heterochromatin are more common in other eukaryotes (Bloom 2014; Copenhaver  
122 et al. 1999; Vincenten et al. 2015; Malik and Henikoff 2009). Equally, although transposable  
123 elements are ubiquitous, their diversity and abundance varies between species (Feschotte  
124 and Pritham 2007; Beauregard et al. 2008; McClintock 1956). Transposons are typically  
125 heterochromatic and show RNA polymerase-II suppression, caused by epigenetic  
126 modifications (Slotkin and Martienssen 2007). Repetitive sequences are also frequently  
127 crossover-suppressed during meiosis, in order to limit non-allelic homologous recombination

128 and genome instability (Sasaki et al. 2010). However, evidence exists for specific transposon  
129 families promoting meiotic recombination in plants, fungi and animals (Myers et al. 2005; Shi  
130 et al. 2010; Sasaki et al. 2013; Horton et al. 2012; Yandea-Nelson et al. 2005). For  
131 example, meiotic gene conversion, although not crossovers, has been observed in maize  
132 centromeric transposons (Shi et al. 2010), which indicates DSB formation and interhomolog  
133 repair. However, the extent to which plant transposons and repetitive sequences initiate  
134 meiotic recombination genome-wide has remained unclear.

135

136 To further explore relationships between recombination and chromatin, in genes versus  
137 repeats, we mapped meiotic DSBs and crossovers throughout the ~135 megabase  
138 *Arabidopsis thaliana* genome, which contains diverse DNA and RNA transposons  
139 (Supplemental Fig. S1) (Buisine et al. 2008; Quadrana et al. 2016; Stuart et al. 2016;  
140 Kawakatsu et al. 2016; Slotkin and Martienssen 2007). We show that *Arabidopsis* meiotic  
141 DSB hotspots are concentrated in gene promoters, terminators and introns. We also observe  
142 strong DSB hotspots inside specific families of DNA transposons, which are enriched within  
143 gene regulatory sequences. We show that nucleosome occupancy, driven by AT-sequence  
144 richness, is a major determinant of DSB hotspot strength and location in both genes and  
145 repeated sequences. Using the *met1* DNA methylation mutant, we demonstrate coordinate  
146 epigenetic remodeling of transcription, chromatin and recombination. Activation of meiotic  
147 DSBs in *met1* occurs most strongly in centromeric heterochromatin and specific Gypsy and  
148 EnSpm/CACTA transposon families. Together, our work reveals both conserved and plant-  
149 specific aspects to the meiotic DSB landscape and its relationship to chromatin.

150

151

152

153

154 **Results**

155

156 **Purification and sequencing of Arabidopsis SPO11-1-oligonucleotides**

157 In order to map meiotic DSBs throughout the Arabidopsis genome we sought to purify and  
158 sequence SPO11-1-oligonucleotides (Pan et al. 2011; Grelon et al. 2001). We generated a  
159 6×Myc translational fusion at the C-terminus of Arabidopsis *SPO11-1*, driven by the  
160 endogenous promoter, which fully complements *spo11-1* fertility and crossover frequency,  
161 measured using fluorescent recombination reporter lines (Fig. 1A–1B and Supplemental  
162 Table S1) (Berchowitz and Copenhaver 2008; Grelon et al. 2001). To analyze SPO11-1-Myc  
163 during meiosis we performed immunocytology using  $\alpha$ -Myc antibodies. SPO11-1-Myc foci  
164 were detected from leptotene until pachytene stage, associated with the meiotic  
165 chromosome axis, which was visualized by co-immunostaining for the ASYNAPTIC1 (ASY1)  
166 HORMA domain protein (Fig. 1C and Supplemental Fig. S2). SPO11-1-Myc foci showed a  
167 comparable number (mean=204.6 foci,  $n=10$ ) and duration to those reported for its binding  
168 partner MTOPVIB (Fig. 1C and Supplemental Fig. S2) (Vrielynck et al. 2016). No  $\alpha$ -Myc  
169 signal was detected above background in wild type meiotic cells, or in *SPO11-1-Myc* somatic  
170 cells (Fig. 1C). Therefore, SPO11-1-Myc is functional and accumulates on meiotic  
171 chromosomes, coincident with endogenous DSB formation (Vrielynck et al. 2016; Sanchez-  
172 Moran et al. 2007).

173

174 Following protein extraction from meiotic-stage floral buds, SPO11-1-Myc was detectable as  
175 a ~54 kDa band using western blotting (Fig. 1D). Oligonucleotides covalently attached to  
176 SPO11-1-Myc can be radioactively 3'-end labeled using terminal transferase (Neale and  
177 Keeney 2009), which revealed 60–70 kDa complexes (Fig. 1E). No signal was observed  
178 when the protocol was repeated without antibody (Fig. 1E). Following proteinase K digestion  
179 of SPO11-1-Myc immunoprecipitates and PAGE separation, we detected radiolabelled

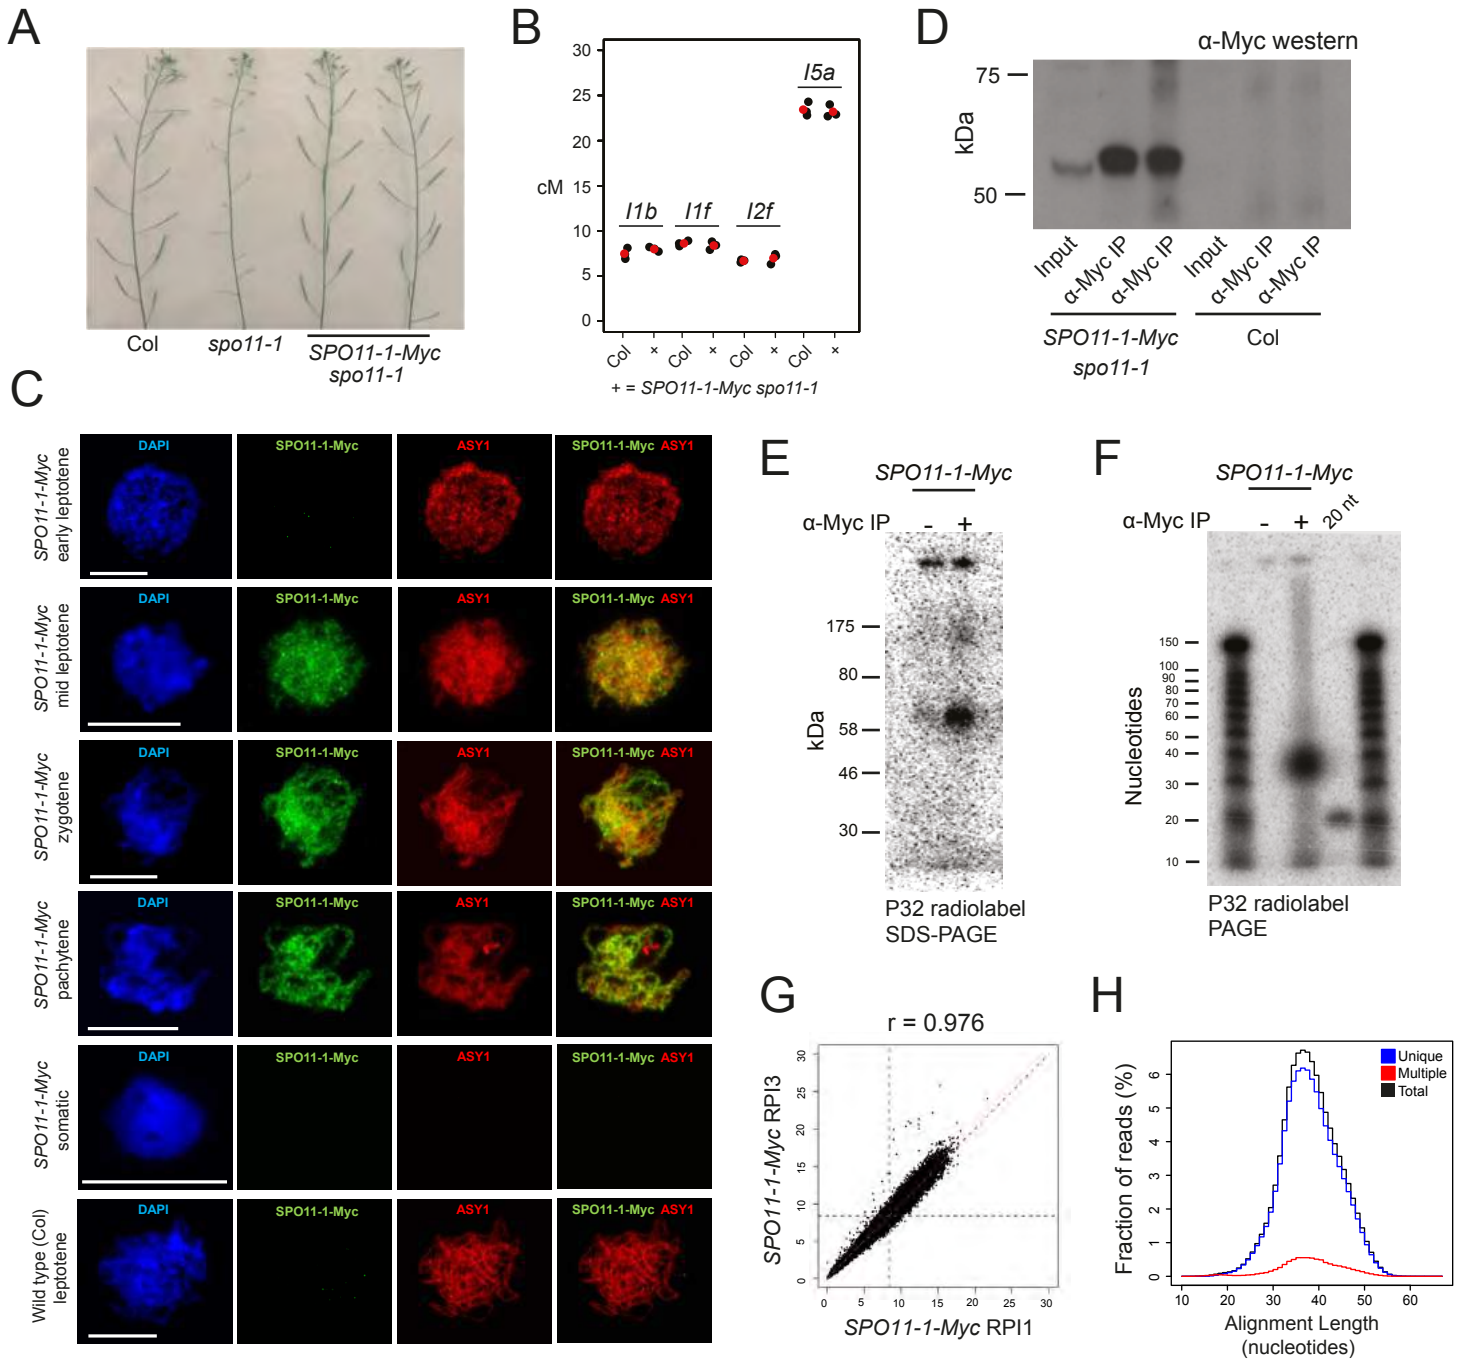



180 **Figure 1. Purification and sequencing of Arabidopsis SPO11-1-oligonucleotides.** (A)  
181 Inflorescences from wild type (Col), *spo11-1* and *SPO11-1-Myc spo11-1* plants. (B)  
182 Crossover frequency (cM) measured using fluorescent crossover reporter lines in Col or  
183 *SPO11-1-Myc spo11-1*, with mean values in red. (C) Nuclei from *SPO11-1-Myc* or Col pollen  
184 mother cells immunostained for  $\alpha$ -Myc (green) or  $\alpha$ -ASY1 (red), and stained for DAPI (blue).  
185 Scale bars=10 $\mu$ M. (D)  $\alpha$ -Myc western blotting from *SPO11-1-Myc* or Col extracts, before and  
186 after  $\alpha$ -Myc immunoprecipitation ( $\alpha$ -Myc-IP). (E) Detection of end-radiolabelled SPO11-1-  
187 Myc complexes following immunoprecipitation and SDS polyacrylamide gel electrophoresis  
188 (SDS-PAGE). (F) Detection of purified SPO11-1-oligonucleotides following proteinase K  
189 digestion of immunoprecipitates and polyacrylamide gel electrophoresis (PAGE). A labeled  
190 20 base oligonucleotide (20 nt) was run alongside as a size control. (G) Correlation of  
191 SPO11-1 in adjacent 10 kb windows for wild type libraries RPI1 and RPI3 (Supplementary  
192 Table 2). Blue dotted lines indicate genome average values. The Pearson's correlation  
193 coefficient ( $r$ ) is printed above. (H) Histogram showing lengths of uniquely aligning (blue),  
194 multiple-aligning (red) and total (black) SPO11-1 reads.

195

196 SPO11-1-oligonucleotides ~35–45 bases in length (Fig. 1F). SPO11-1-oligonucleotides were  
197 gel purified and used to generate sequencing libraries, using a protocol adapted from  
198 budding yeast (Supplemental Fig. S3) (Pan et al. 2011). Three biological replicate wild type  
199 (*SPO11-1-Myc spo11-1*) libraries were sequenced to high depth (11–28 million mapped  
200 reads), which showed significant correlation (Fig. 1G, Supplemental Fig. S4 and  
201 Supplemental Tables S2–S3). For example, Pearson’s  $r$  between replicates was 0.97–0.98  
202 at the 10 kb scale (Supplemental Table S3). The majority (92.2–93.4%) of SPO11-1-  
203 oligonucleotide reads (hereafter called SPO11-1) aligned uniquely, and multiple-mapped  
204 reads with equal alignment scores were randomly assigned (Fig. 1H and Supplemental Table  
205 S2).

206

### 207 **Genomic landscapes of SPO11-1-oligonucleotides, crossovers, euchromatin and** 208 **heterochromatin**

209 We analyzed SPO11-1 levels in 10 kb windows and plotted DSB frequency throughout the  
210 Arabidopsis genome (Fig. 2A–2C). Consistent with broad-scale patterns of crossover  
211 recombination (Choi et al. 2013; Giraut et al. 2011; Salomé et al. 2012), SPO11-1 is highest  
212 in the euchromatic chromosome arms, lowest in the centromeres (Fig. 2A), and shows a  
213 positive correlation with genes ( $r=0.777$ ) and a negative correlation with transposon density  
214 ( $r=-0.816$ ). To compare with epigenetic marks, we performed ChIP-seq for the gene-enriched  
215 histone modification H3K4<sup>me3</sup>, which was positively correlated with SPO11-1 ( $r=0.700$ ),  
216 whereas centromere-enriched DNA methylation was negatively correlated ( $r=-0.831$ ) (Fig.  
217 2A–2B and Supplemental Table S6) (Yelina et al. 2015). This is consistent with chromatin  
218 playing a major role in shaping the Arabidopsis DSB landscape, at the chromosome scale.

219

220 In order to compare meiotic DSB levels with the frequency of final crossover products, we  
221 used 2,499 crossover events mapped in 363 Col×Ler F<sub>2</sub> plants by genotyping-by-sequencing

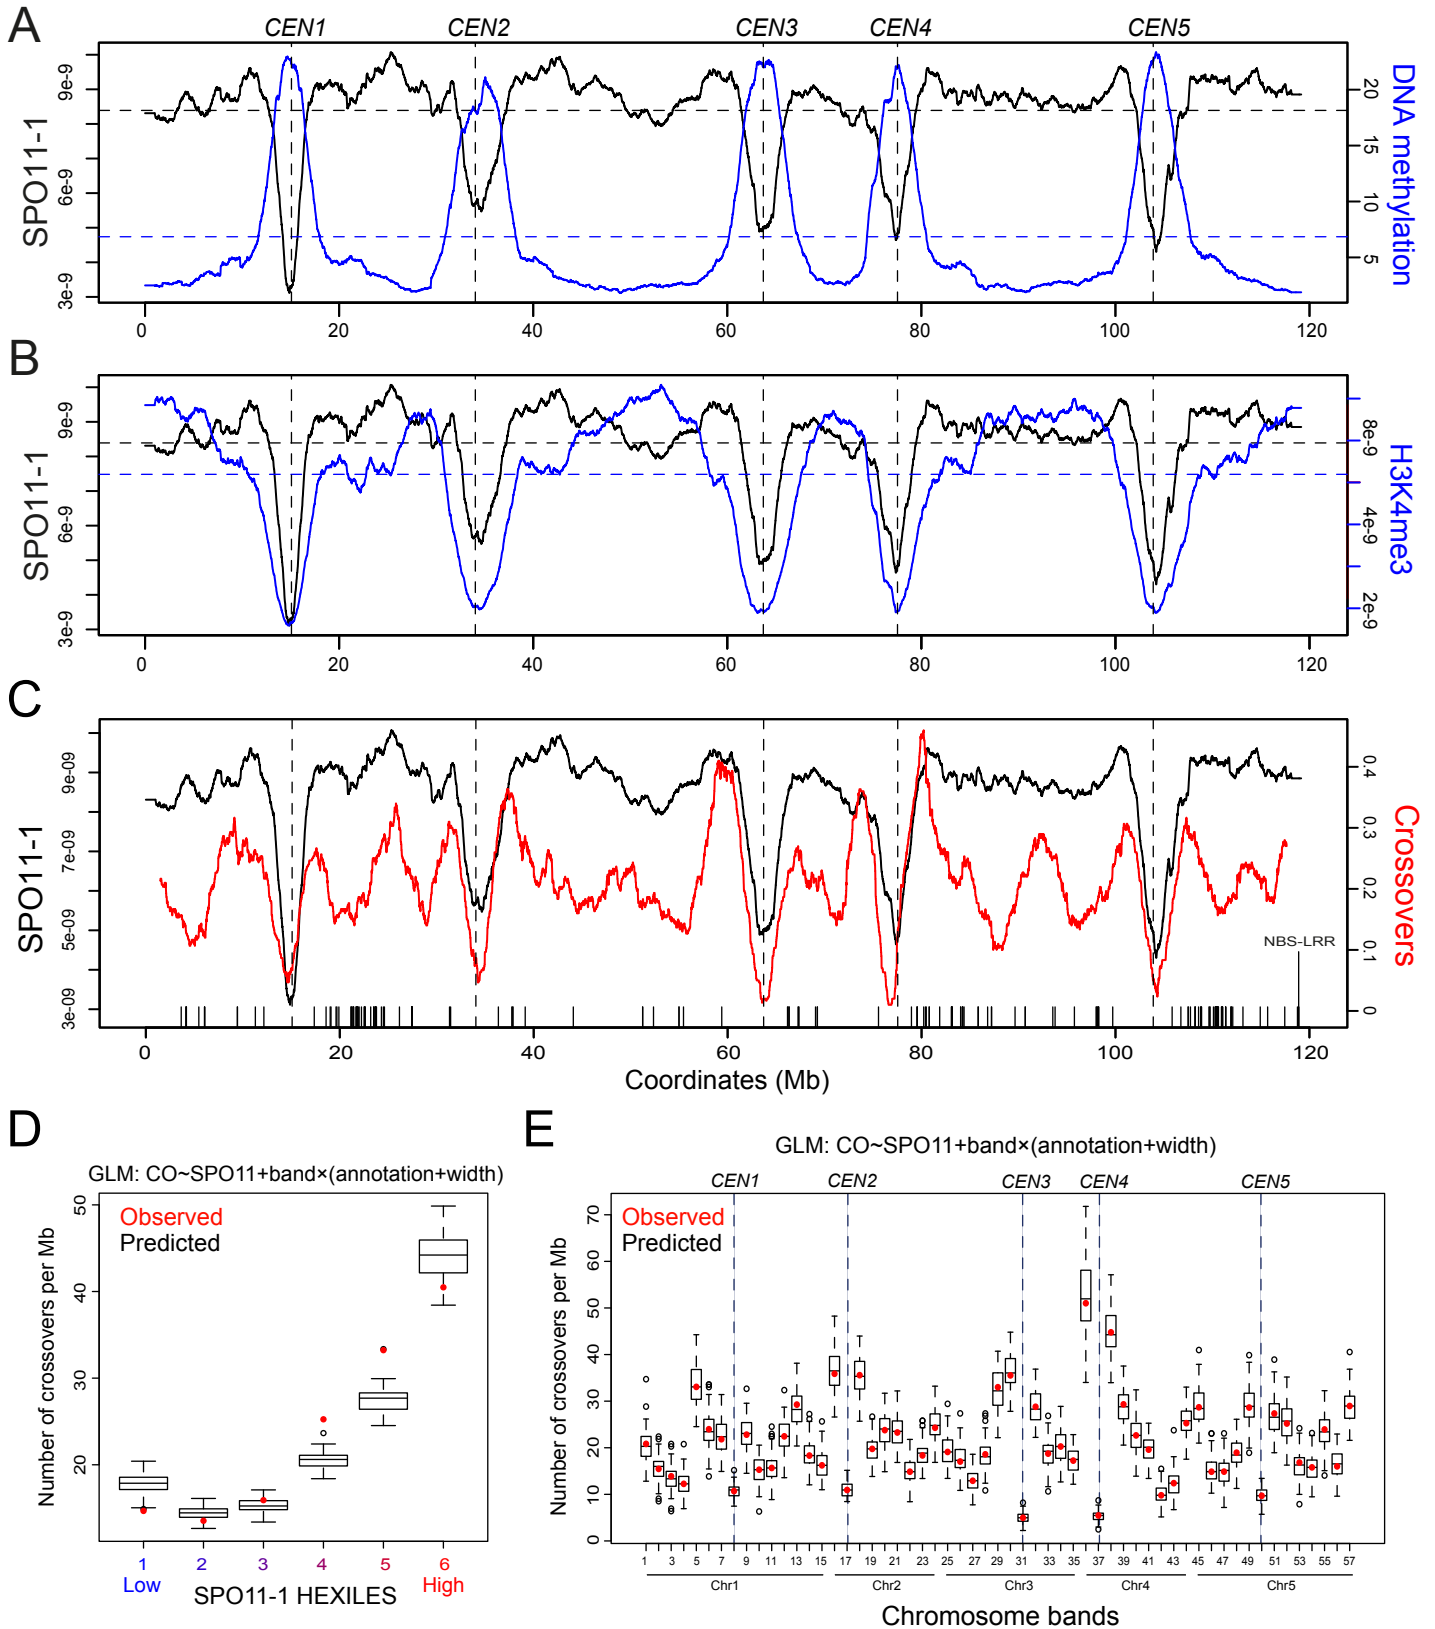

222 **Figure 2. Genomic landscape of SPO11-1 DSBs, crossovers, euchromatin and**  
223 **heterochromatin.** (A) SPO11-1 (black) and DNA methylation (blue) density throughout the  
224 Arabidopsis genome, with centromeres indicated by vertical dotted lines. Horizontal dotted  
225 lines represent mean values. (B) As for (A), but plotting SPO11-1 (black) and H3K4<sup>me3</sup> (blue).  
226 (C) As for (A), but plotting SPO11-1 (black) and crossover frequency (red). Crossovers were  
227 identified using genotyping-by-sequencing of Col×Ler F<sub>2</sub> plants. X-axis ticks indicate the  
228 positions of NBS-LRR gene homologs. (D) Observed (red dots) crossover overlap per  
229 megabase for SNP intervals, grouped according to SPO11-1 hexiles (1=low SPO11-1,  
230 6=high SPO11-1). Boxplots show the range of predicted crossover overlap values based on  
231 the generalized linear model (GLM) formula:  $CO \sim SPO11 + band \times (annotation + width)$ . (E) As  
232 for (D), but showing observed and predicted crossover overlaps per megabase, according to  
233 two megabase chromosomal bands.

234

235

236

237

238

239

240

241

242

243

244

245

246

247 (Fig. 2C–2E and Supplemental Table S4) (Choi et al. 2016; Rowan et al. 2015). Crossovers  
248 were mapped between Col/Ler SNPs to a mean resolution of 970 bp. At the chromosome  
249 scale there was a positive correlation between SPO11-1 and crossover frequency ( $r=0.593$ )  
250 (Fig. 2C). However, there was also significant variation in the ratio of SPO11-1 to crossovers  
251 along the chromosome arms (Fig. 2C), which may reflect modification of recombination  
252 downstream of DSB formation, for example by polymorphism, or additional features of  
253 chromosome architecture. We used a logistic model to analyze the likelihood of observing  
254 crossovers relative to other genome features. This revealed a strong positive effect for  
255 SPO11-1 levels ( $10.87$ ,  $P=9.36\times 10^{-87}$ ), with weaker but significant effects for chromosome  
256 position and sequence annotation (Fig. 2D–2E and Supplemental Table S5). Therefore,  
257 overall higher levels of initiating meiotic DSBs associate with higher final crossover levels.

258

### 259 **SPO11-1 DSB hotspots in nucleosome-depleted gene regulatory regions**

260 Budding yeast meiotic DSB hotspots occur in nucleosome-depleted regions within gene  
261 promoters (Pan et al. 2011; Lam and Keeney 2015; Wu and Lichten 1994; Fan and Petes  
262 1996; Nicolas et al. 1989), whereas mammalian PRDM9-dependent DSB hotspots tend to be  
263 located intergenically at specific C-rich sequence motifs (Myers et al. 2008; Brick et al. 2012;  
264 Kong et al. 2010; Lange et al. 2016). Therefore, we analyzed Arabidopsis SPO11-1-  
265 oligonucleotides in relation to gene transcriptional start sites (TSSs) and termination sites  
266 (TTS) (Fig. 3A–3B). We also analyzed nucleosome occupancy by performing micrococcal  
267 nuclease digestion of chromatin, followed by sequencing of mononucleosomal DNA (MNase-  
268 seq) (Fig. 3A–3B and Supplemental Table S7) (Choi et al. 2016). Similar to budding yeast,  
269 SPO11-1 was highest in Arabidopsis nucleosome-free regions located in gene promoters  
270 (Fig. 3A–3C). Interestingly we also observe strong DSB hotspots in nucleosome-free  
271 terminators, where plant crossover hotspots are also observed (Fig. 3A–3C) (Choi et al.  
272 2013; Wijnker et al. 2013). A further difference is that Arabidopsis genes possess on average

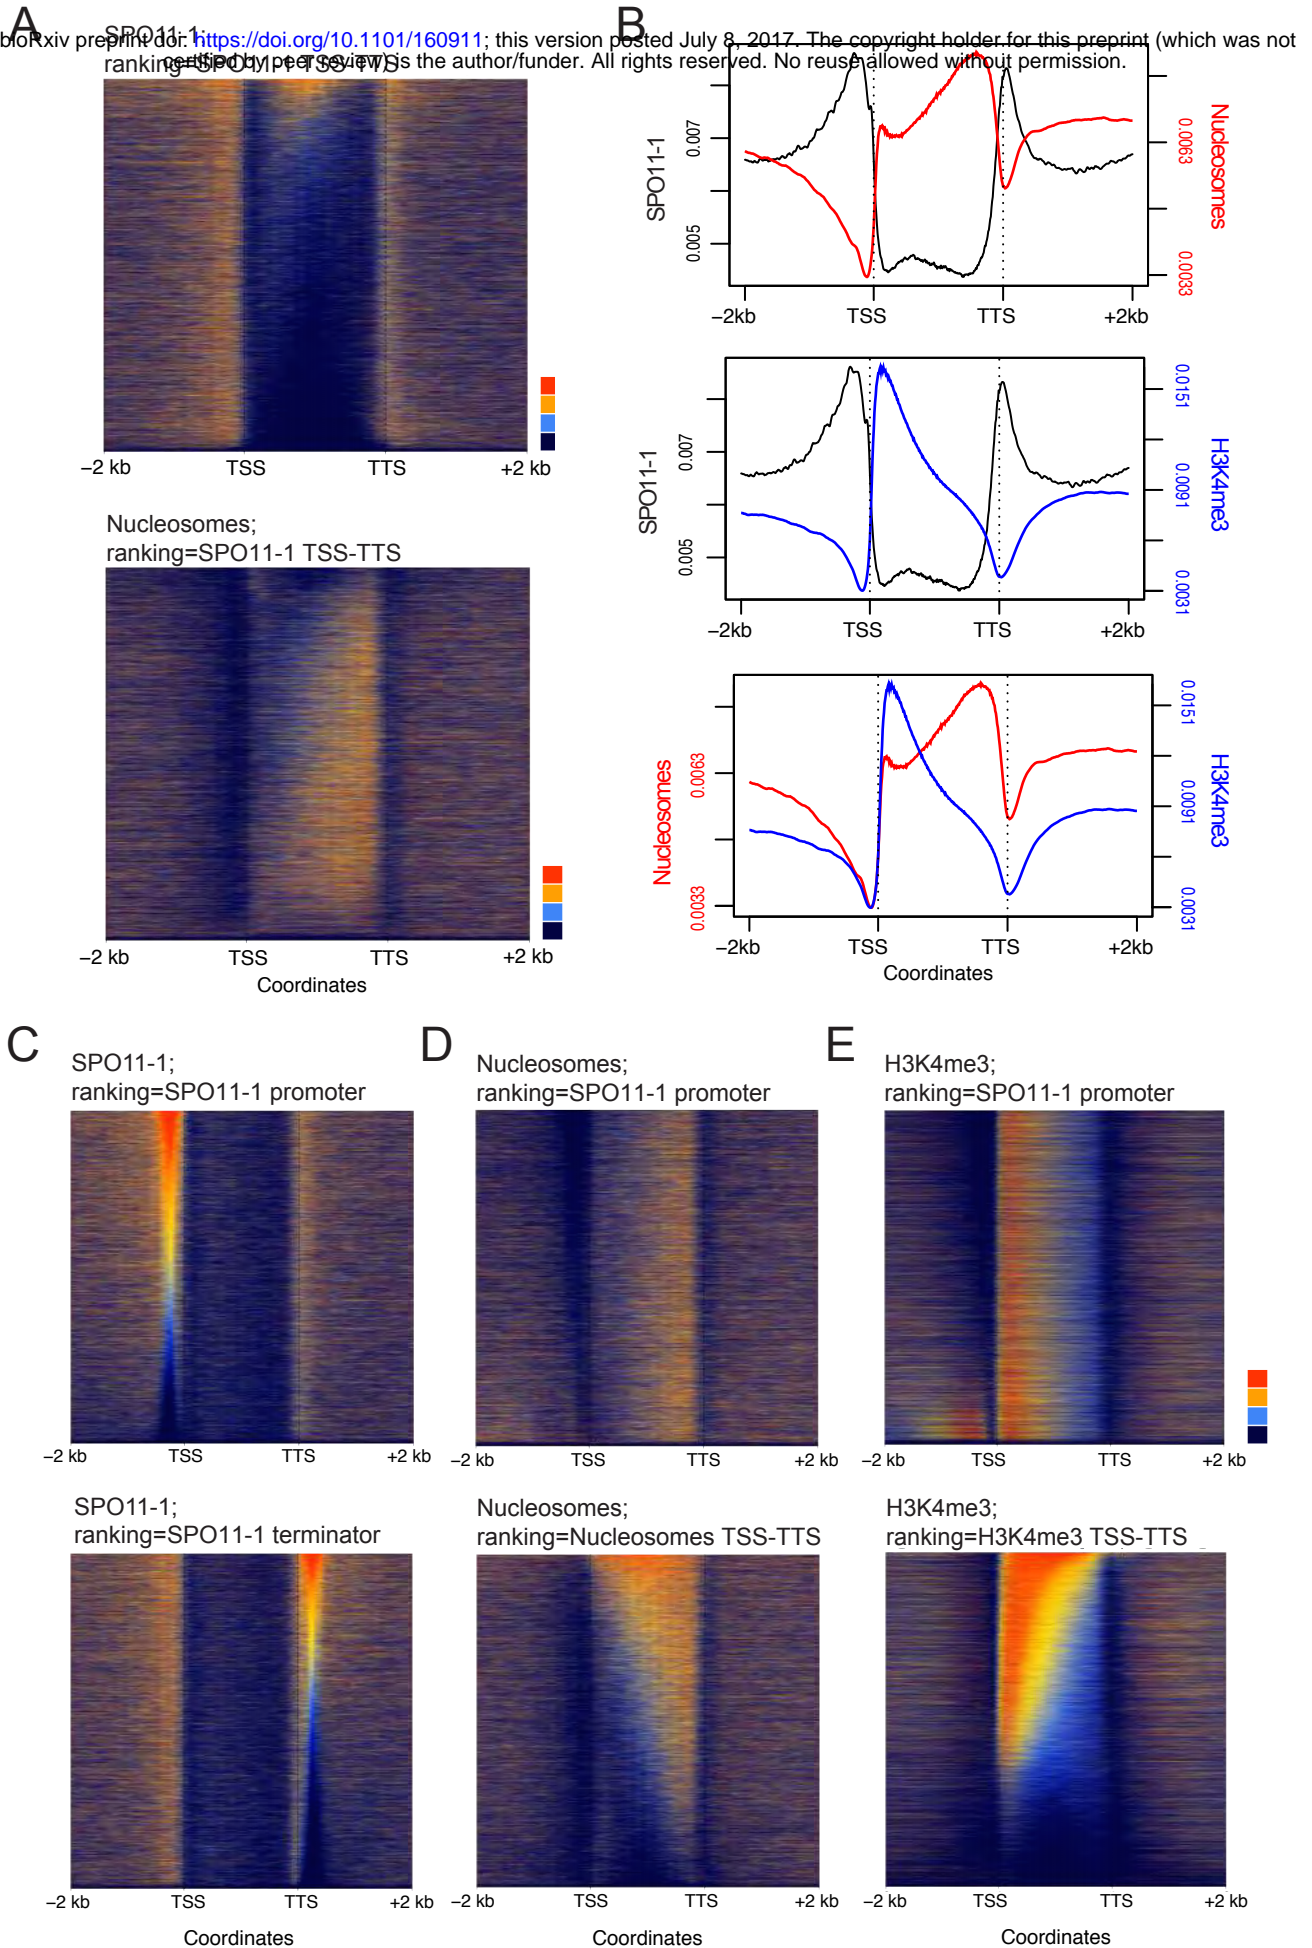

273 **Figure 3. SPO11-1 DSB hotspots in gene promoter and terminator nucleosome-free**  
274 **regions.** (A) Heat maps of SPO11-1-oligonucleotides (upper) and nucleosomes (lower)  
275 within gene transcriptional units (between transcriptional start (TSS) and termination (TTS)  
276 sites) and 2 kb flanking regions. Each row represents an individual gene, which have been  
277 ordered by SPO11-1-oligonucleotide normalized coverage values between TSS and TTS.  
278 SPO11-1 and nucleosome values equal to defined quantiles were mapped linearly to a  
279 vector of six colors (dark blue (lowest), blue, light blue, yellow, orange, red (highest)). (B)  
280 Density of SPO11-1-oligonucleotides (black), nucleosome occupancy (MNase-seq, red), or  
281 H3K4<sup>me3</sup> (ChIP-seq, blue) in wild type, across gene transcriptional units (TSS to TTS) and in  
282 flanking 2 kb windows. (C) Heat maps as for (A), but showing SPO11-1 ranked by SPO11-1  
283 levels in gene promoters (upper, -500 bp upstream of TSS) or gene terminators (lower, +500  
284 bp downstream of TTS). (D) Heat maps as for (A), but showing nucleosomes ranked by  
285 SPO11-1 levels in gene promoters (upper) or by nucleosomes within TSS–TTS (lower). (E)  
286 Heat maps as for (A), but showing H3K4<sup>me3</sup> ranked by SPO11-1 levels in gene promoters  
287 (upper) or by H3K4<sup>me3</sup> within TSS–TTS (lower).

288

289

290

291

292

293

294

295

296

297

298 6.7 exons (Cheng et al. 2017), whereas budding yeast genes lack introns (Pan et al. 2011).  
299 We observe that Arabidopsis introns have higher SPO11-1 and lower nucleosomes  
300 compared with exons (Supplemental Fig. S5B–S5D). However, SPO11-1 is overall  
301 suppressed within relatively nucleosome-occupied gene bodies, compared with flanking  
302 nucleosome-depleted promoter and terminator regions (Fig. 3A–3C and Supplemental Fig.  
303 S5A). As expected, H3K4<sup>me3</sup> shows prominent enrichment at the +1 nucleosome position,  
304 immediately downstream of TSS, within gene bodies (Fig. 3B) (Zhang et al. 2009).

305

306 To investigate control of DSB levels we ranked genes according to SPO11-1 in 500 bp  
307 windows upstream of gene TSS (promoters), or downstream of TTS (terminators) (Fig. 3C).  
308 Levels of promoter SPO11-1 did not strongly associate with terminator levels, showing that  
309 meiotic DSBs vary independently at opposite ends of genes (Fig. 3C). We used the SPO11-1  
310 promoter ranking to look at associated variation in nucleosome occupancy (MNase) and  
311 H3K4<sup>me3</sup> levels. High SPO11-1 promoters strongly associate with lower promoter  
312 nucleosome occupancy, consistent with DNA accessibility being a major determinant of  
313 Arabidopsis DSB levels (Fig. 3D). In contrast, H3K4<sup>me3</sup> levels within genes did not show a  
314 strong association with promoter SPO11-1 levels (Fig. 3E). This supports a recombination-  
315 promoting role for H3K4<sup>me3</sup> downstream of DSB formation, consistent with analysis of mouse  
316 and budding yeast SPO11-oligonucleotides (Tischfield and Keeney 2012; Lange et al. 2016).

317

### 318 **SPO11-1 hotspots and coldspots in transposable elements**

319 To explore meiotic DSB levels within repetitive sequences we selected 29,150 transposable  
320 elements from 10 DNA and RNA families for analysis (Supplemental Fig. S1 and  
321 Supplemental Table S8) (Buisine et al. 2008). Extensive SPO11-1 variation was observed  
322 between transposon families, with high DSB levels in Helitrons, which transpose via rolling-  
323 circle replication, and Pogo/Tc1/Mariner and MuDR ‘cut-and-paste’ DNA transposons (Fig.



324 4A and Supplemental Table S8) (Kapitonov and Jurka 2001; Slotkin and Martienssen 2007).  
325 In contrast, retrotransposons that replicate via RNA intermediates, including LTR and non-  
326 LTR families, were SPO11-1 coldspots (Fig. 4A and Supplemental Table S8) (Beauregard et  
327 al. 2008). As observed for genes (Fig. 3), variation in transposon family SPO11-1 negatively  
328 correlated with nucleosome occupancy ( $r=-0.96$ ) (Fig. 4B and Supplemental Table S8). We  
329 divided transposons into six groups (hexiles) after ranking by within element SPO11-1 levels  
330 (Figure 4C; hexile 1=highest, hexile 6=lowest). This grouping showed strong correlations  
331 between higher SPO11-1 and reduced transposon lengths ( $r=-0.80$ ), lower nucleosome  
332 occupancy ( $r=-0.94$ ), greater DNA ( $r=0.95$ ) and fewer RNA transposons ( $r=-0.95$ ) (Fig. 4C  
333 and Supplemental Tables S8-S9). At the chromosome scale, high SPO11-1 transposons  
334 (e.g. Helitrons and Pogo/Tc1/Mariner) show elevated density in the chromosome arms and  
335 pericentromeres, whereas low SPO11-1 transposons (e.g. Gypsy LTR) are centromere-  
336 enriched (Fig. 4D). Differences in DSB activity between transposon families are also evident  
337 locally, for example comparing a nucleosome-dense retroelement coldspot *ATCOPIA4* with  
338 an adjacent cluster of nucleosome-depleted Helitron hotspots (Fig. 4E–4F). Many DSB  
339 hotspot DNA transposons are short, non-autonomous fragments, although high SPO11-1  
340 was also observed within full length Helitron and *Lemi1* Pogo transposons (Supplemental  
341 Fig. S6A–S6D) (Feschotte and Mouchès 2000; Kapitonov and Jurka 2001). Hence, despite  
342 the expectation that transposons would be suppressed for meiotic DSBs, we observe that  
343 specific families of repetitive elements are nucleosome-depleted SPO11-1 hotspots.

344

#### 345 **Nucleosomes, DNA sequence and SPO11-1 within genes and transposons**

346 To further investigate spatial relationships between meiotic DSBs, chromatin and DNA  
347 sequence, we analyzed 4 kb windows around gene TSS and TTS, or transposon start and  
348 end coordinates, each according to SPO11-1 hexile groups (Fig. 5A–5B and Tables S9–  
349 S11). Again, a strong negative relationship between SPO11-1 and nucleosome occupancy

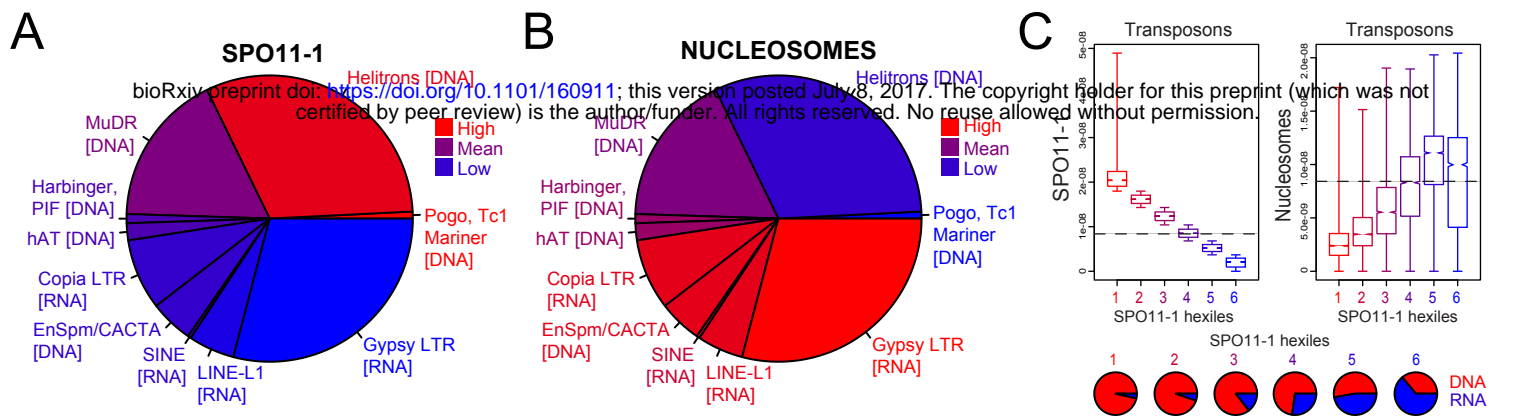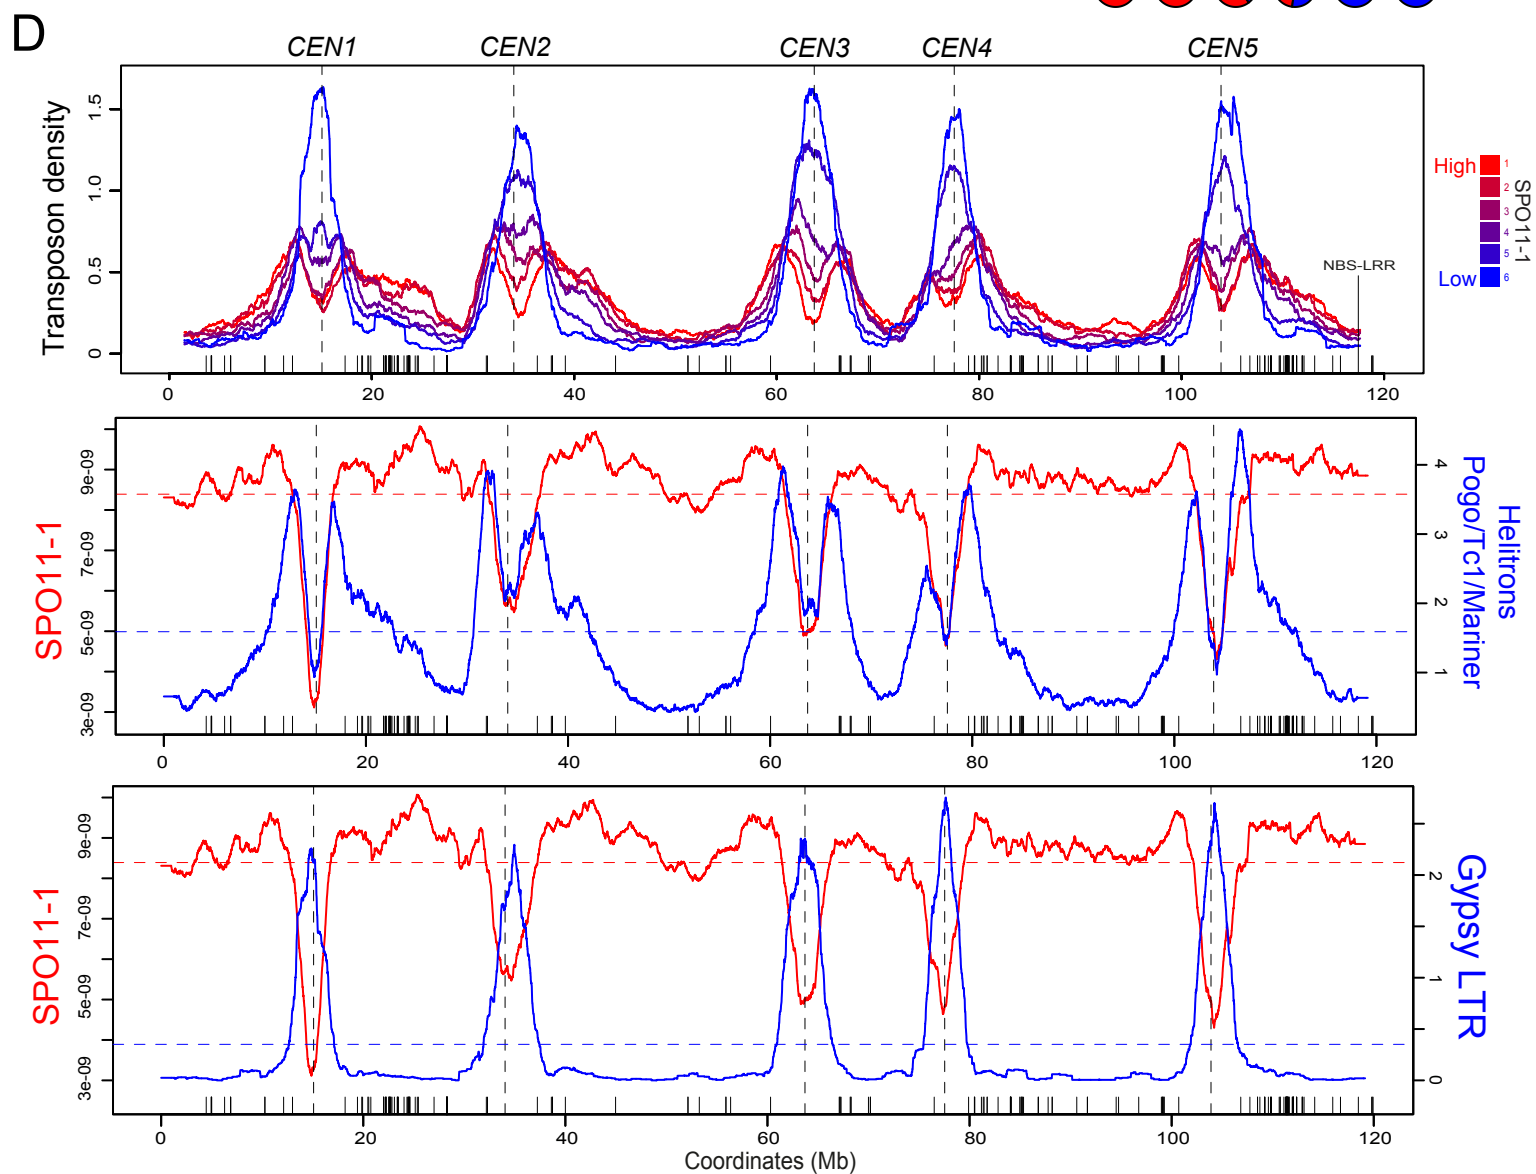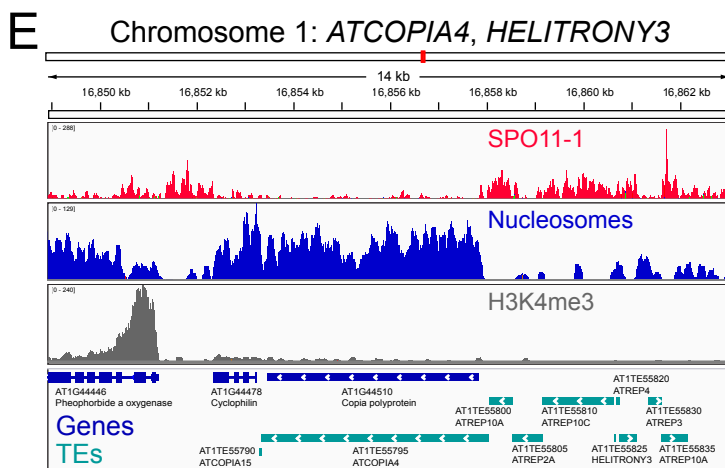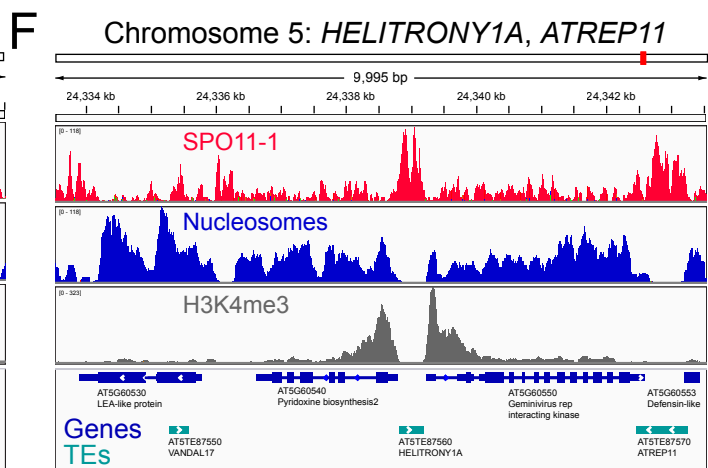

350 **Figure 4. Meiotic recombination and chromatin variation between Arabidopsis**  
351 **transposons.** (A) Pie chart showing Arabidopsis transposon families, with slice size  
352 proportional to physical length, and color-coded according to SPO11-1 levels. The color  
353 equivalent to the genome-wide mean value is inset. (B) As for (A), but showing nucleosome  
354 occupancy (MNase-seq). (C) Box plots showing SPO11-1 and nucleosome occupancy,  
355 according to transposon SPO11-1 hexile groups, with horizontal lines indicating the genome  
356 average value. Inset pie charts show the proportion of DNA (red) and RNA (blue)  
357 transposons for each SPO11-1 hexile. (D) Density of transposons through the Arabidopsis  
358 genome according to SPO11-1 hexile (red=highest SPO11-1, blue=lowest SPO11-1). X-axis  
359 ticks indicate NBS-LRR gene homologs. Plotted beneath are SPO11-1 (red) versus  
360 Helitron/Pogo/Tc1/Mariner class DNA transposons (blue), or Gypsy RNA transposons (blue).  
361 (E)–(F) Close-ups of chromosomal regions showing SPO11-1 (red), nucleosomes (blue) and  
362 H3K4<sup>me3</sup> (grey) density, relative to gene (dark blue) and transposon (light blue) annotation  
363 shown beneath. Note in (F), the presence of a *DEFENSIN* gene At5g60553 associated with  
364 a Helitron *ATREP11* hotspot.

365

366

367

368

369

370

371

372

373

374

375 was observed in both genes and transposons (Fig. 5A–5B and Supplemental Tables S9–  
376 S11). In the high SPO11-1 regions, we also observe quantitative enrichment of AT-rich  
377 sequence motifs that have previously been associated with high crossovers (Fig. 5A–5B and  
378 Supplemental Tables S6–S8) (Horton et al. 2012; Choi et al. 2013; Shilo et al. 2015; Wijnker  
379 et al. 2013). As AT-sequence richness is known to exclude nucleosomes (Segal and Widom  
380 2009), we propose that these motifs cause higher SPO11-1 accessibility via this effect,  
381 leading to higher DSB formation and crossover frequency (Fig. 5A–5B).

382

383 We also note that high SPO11-1 genes and transposons show close proximity to one  
384 another (Fig. 5A–5B). Helitron transposons are known to insert into AT dinucleotides  
385 (Kapitonov and Jurka 2001), and *Lem1* Pogo transposons insert into TA dinucleotides  
386 (Guermonprez et al. 2008). Therefore, transposon integration site preference likely  
387 contributes to DNA element enrichment in AT-rich gene promoters and terminators, where  
388 they further contribute to nucleosome exclusion and high meiotic DSB levels (Fig. 5A–5B).  
389 High recombination rates may also provide an explanation for the tendency of DSB hotspot  
390 transposons to be shorter (Supplemental Tables S8–S9), due to promotion of non-  
391 homologous recombination and sequence rearrangement (Sasaki et al. 2010). Together,  
392 these findings reveal intimate connections between DNA sequence, chromatin and  
393 recombination around Arabidopsis genes and transposons.

394

### 395 **Meiotic DSB hotspot transposons are enriched in proximity to immunity genes**

396 To investigate genes associated with high DSB levels, we tested for enrichment of Gene  
397 Ontology (GO) terms, following ranking by promoter SPO11-1 levels (Fig. 3C). This revealed  
398 a strong association with biotic defense GO terms (Supplemental Table S12), which was  
399 driven by high recombination *DEFENSIN* genes (Supplemental Fig. S6E–S6F). *DEFENSINS*  
400 encode small cysteine-rich peptides with roles in antimicrobial defense and pollen-pistil

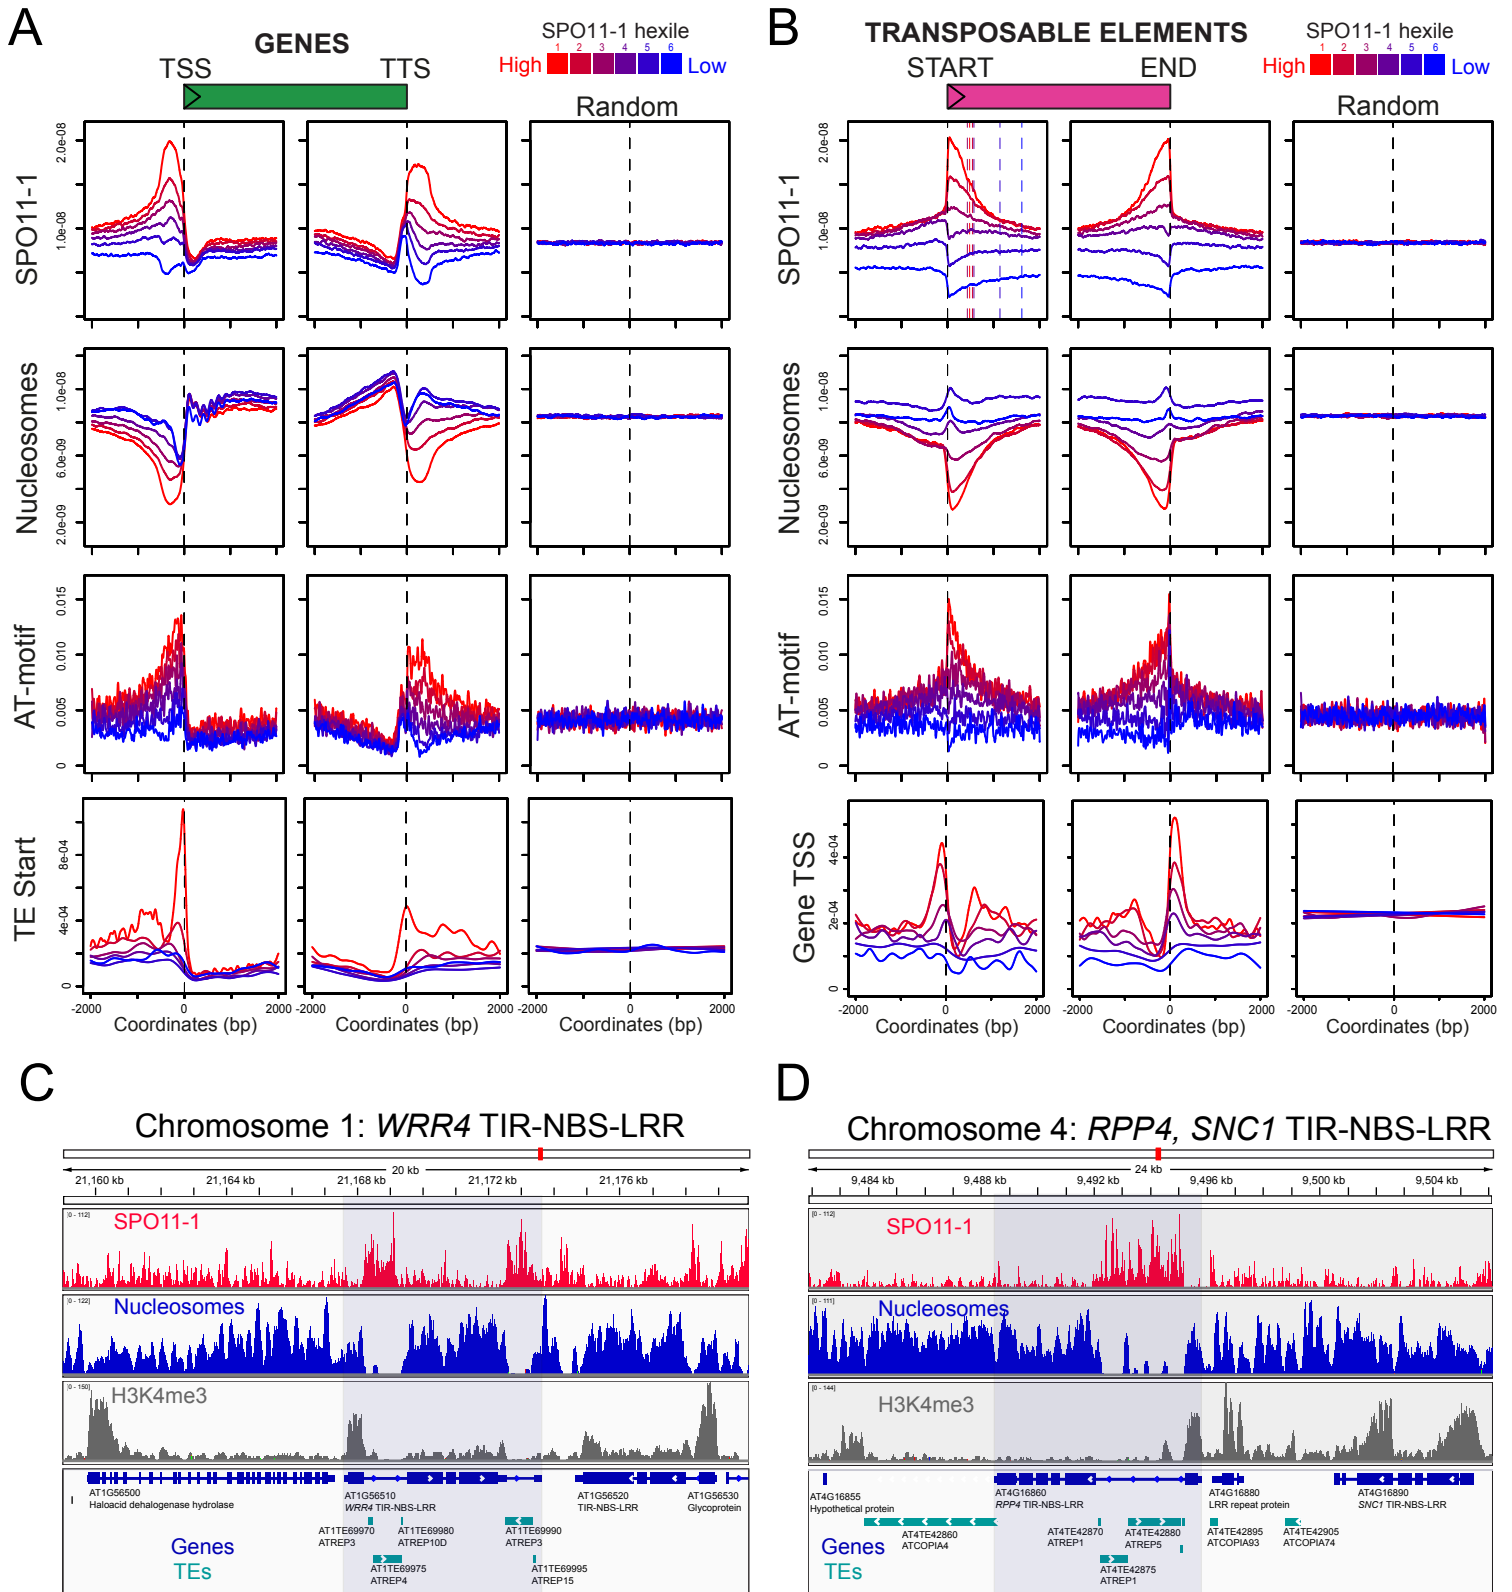

401 **Figure 5. Nucleosomes, AT-sequence motifs and SPO11-1 DSBs within genes and**  
402 **transposons.** (A) Density of SPO11-1, nucleosomes, AT-motifs (Choi et al. 2013), and TE  
403 start coordinates in 4 kb windows around gene transcriptional start sites (TSSs) or  
404 termination sites (TTSs), or the same number of random (Random) positions. Genes are  
405 grouped according to SPO11-1 promoter or terminator hexiles (red=highest, blue=lowest).  
406 (B) As for (A) but analyzing transposon SPO11-1 hexiles, and showing gene TSS proximity.  
407 (C) Close-ups of chromosomal regions showing SPO11-1 (red), nucleosomes (blue) and  
408 H3K4<sup>me3</sup> (grey), relative to gene (dark blue) and transposon (light blue) annotations. The  
409 *WRR4* TIR-NBS-LRR resistance gene is highlighted which contains transposon hotspots  
410 within its introns. (D) As for (C), with the *RPP4* TIR-NBS-LRR resistance gene highlighted,  
411 which contains intronic hotspot transposons.

412

413

414

415

416

417

418

419

420

421

422

423

424

425

426 interactions (Silverstein et al. 2005). Further association of recombination hotspots and  
427 immunity genes is evident at the chromosome scale, where high SPO11-1 transposons show  
428 elevated density within the nucleotide binding site-leucine rich repeat (NBS-LRR) immune  
429 gene clusters on the right arms of chromosomes 1 and 5 (Fig. 4D) (Choi et al. 2016), and 73  
430 of 197 NBS-LRR genes are within 500 base pairs of DSB hotspot transposons  
431 (Supplemental Table S13). For example, the NBS-LRR crossover hotspots *RAC1* and *HRG1*  
432 are flanked by Helitron and MuDR hotspot transposons, respectively (Supplemental Fig.  
433 S6G–S6H and Supplemental Table S13) (Choi et al. 2016). Further examples include the  
434 *RPP4* and *WRR4* oomycete resistance genes, which contain strong *ATREP* Helitron DSB  
435 hotspots within their introns (Fig. 5C–5D and Supplemental Table S13) (van der Biezen et al.  
436 2002; Borhan et al. 2008). As Arabidopsis NBS-LRR genes are sites of natural structural  
437 diversity and DNA methylation polymorphism in populations (Kawakatsu et al. 2016;  
438 Quadrana et al. 2016; Stuart et al. 2016), we propose that gene-proximal DNA transposons  
439 may act as meiotic recombination enhancers, contributing to the high levels of genetic and  
440 epigenetic variation observed at these loci.

441

#### 442 **Epigenetic remodeling of SPO11-1 DSBs, chromatin and transcription in *met1* DNA** 443 **methylation mutants**

444 Heterochromatic marks, such as DNA methylation, play critical roles in transcriptionally  
445 silencing transposable elements and thereby limiting their proliferation within eukaryotic  
446 genomes (Slotkin and Martienssen 2007). To directly investigate the role of heterochromatin  
447 on transposon recombination, chromatin and transcription, we compared SPO11-1,  
448 nucleosomes, H3K4<sup>me3</sup> and RNA expression genome-wide in wild type and *met1*. *MET1*  
449 encodes the major CG sequence context maintenance DNA methyltransferase in  
450 Arabidopsis (Stroud et al. 2013; Saze et al. 2003; Kankel et al. 2003). In *met1* mutants  
451 cytological decondensation of heterochromatin occurs, together with elevated transposon

452 transcription and mobility (Mathieu et al. 2007; Saze et al. 2003; Kato et al. 2003). We  
453 therefore sought to test whether related changes in heterochromatic meiotic DSBs occur in  
454 *met1*. For all experiments we used the null *met1-3* allele, which was isolated in a Columbia  
455 background (Saze et al. 2003).

456

457 At the chromosome-scale *met1-3* shows pronounced loss of CG DNA methylation within the  
458 centromeric regions (Stroud et al. 2013). We observe that this is mirrored by an increased  
459 centromeric SPO11-1 differential between *met1* and wild type ( $\Delta$ SPO11-1) (Fig. 6A). The  
460 *met1*  $\Delta$ SPO11-1 differential also strongly negatively correlates with the *met1* nucleosome  
461 differential ( $r=-0.879$ ), and positively with the *met1* H3K4<sup>me3</sup> differential ( $P=0.837$ ) (Fig. 6A).  
462 This shows that loss of CG DNA methylation causes broad-scale gain of both meiotic  
463 SPO11-1 DSBs and euchromatic chromatin states (reduced nucleosome occupancy and  
464 increased H3K4<sup>me3</sup>) within the *met1* centromeric regions. Regions showing high *met1*  
465  $\Delta$ SPO11-1 differential also strongly correlate with the densities of Gypsy ( $r=0.913$ ) and  
466 EnSpm/CACTA ( $r=0.892$ ) transposons, which are SPO11-1 coldspots in wild type (Figs. 4A  
467 and 6A).

468

469 To analyze changes in recombination at the fine-scale, we compared SPO11-1 levels within  
470 transposons between wild type and *met1* (Fig. 6B). 12,224 transposons (41.9%) showed net  
471 gain of SPO11-1 in *met1* (Fig. 6B). These recombination-activated transposons also show  
472 significantly reduced nucleosome occupancy, elevated H3K4<sup>me3</sup> and increased transcription  
473 in *met1* (ANOVA all  $P=<2.50\times 10^{-6}$ ) (Fig. 6B). This is consistent with the trends observed at  
474 chromosome scale, and demonstrate that loss of CG methylation causes transposons to gain  
475 euchromatic features and increase meiotic recombination initiation. These trends are also  
476 evident at specific transposable elements. For example, the *ATENSPM9* and *ATENSPM10*  
477 EnSpm/CACTA and *ATGP3* Gypsy transposons show coordinate activation of transcription



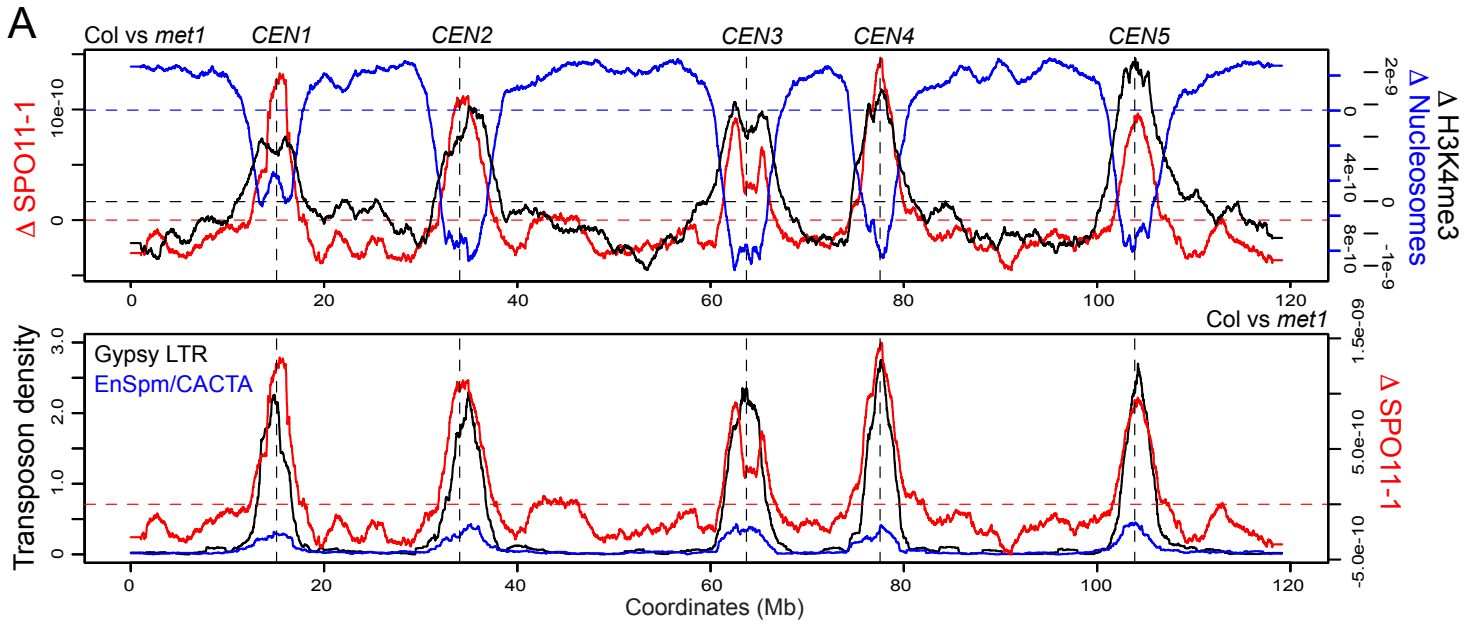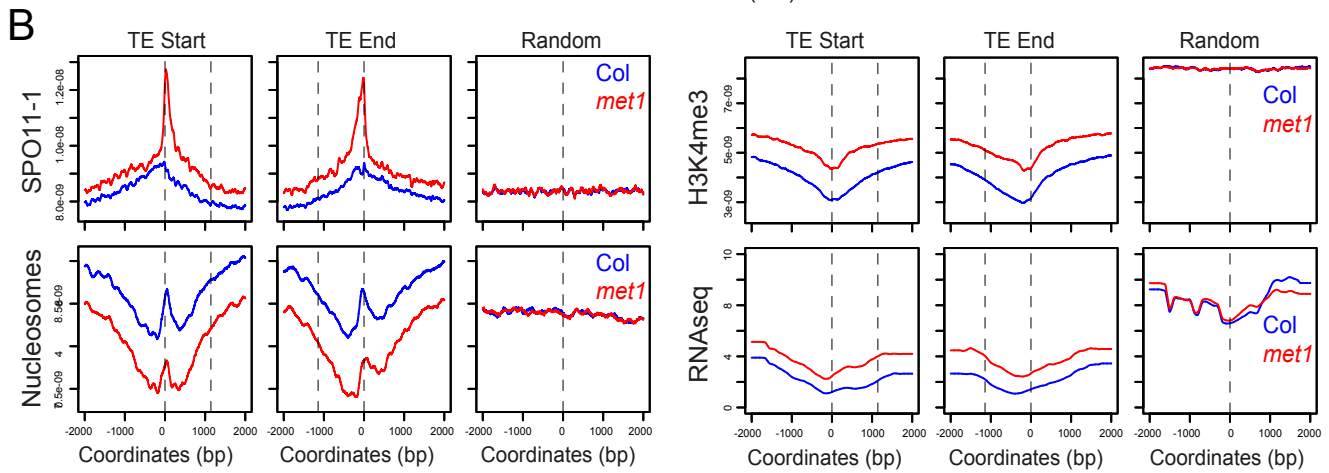

478 **Figure 6. Coordinate epigenetic remodeling of chromatin, transcription and meiotic**  
479 **DSBs in *met1* DNA methylation mutants.** (A) Differential ( $\Delta$ ) signal of SPO11-1 (red),  
480 nucleosomes (blue) and H3K4<sup>me3</sup> (black) in *met1* compared with wild type (Col), throughout  
481 the Arabidopsis genome. Horizontal dotted lines indicate zero differential. Centromeres are  
482 indicated by vertical dotted lines. The lower plot shows  $\Delta$ SPO11-1 (red) compared with  
483 Gypsy (black) and EnSpm/CACTA (blue) transposon densities. (B) SPO11-1, nucleosomes,  
484 H3K4<sup>me3</sup> or RNAseq data in Col (blue) versus *met1* (red), analyzed in 4 kb windows around  
485 the start and end of those transposons with positive  $\Delta$ SPO11-1 values (n=12,224), or the  
486 same number of random positions. The mean width of TEs analyzed is indicated by the  
487 vertical dotted lines.

488

489

490

491

492

493

494

495

496

497

498

499

500

501

502 and meiotic DSBs in *met1*, in addition to showing reduced nucleosome occupancy and gain  
503 of H3K4<sup>me3</sup> (Fig. 7A).

504

505 To further analyze the interaction of chromatin structure and meiotic DSBs, we identified  
506 74,401 highly positioned nucleosomes in wild type from our MNase-seq data. Of these  
507 positions 30,276 showed reduced nucleosome occupancy in *met1* (Fig. 7B). These  
508 nucleosome positions show high CG methylation in wild type, with peak <sup>m</sup>CG levels  
509 immediately flanking the central nucleosomal peak (Fig. 7C). In *met1*, CG methylation is lost  
510 at these positions, which is coincident with significantly reduced nucleosome occupancy and  
511 increased SPO11-1 DSBs (ANOVA all  $P=<2.2\times 10^{-16}$ ) (Fig. 7B). Taken together, this  
512 demonstrates coordinate remodeling of chromatin, histone modifications, transcription and  
513 meiotic recombination, caused by loss of CG DNA methylation in *met1*. Epigenetic  
514 remodeling of *met1* recombination is evident at the scale of chromosomes, transposons and  
515 individual nucleosomes.

516

517

518

519

520

521

522

523

524

525

526

A

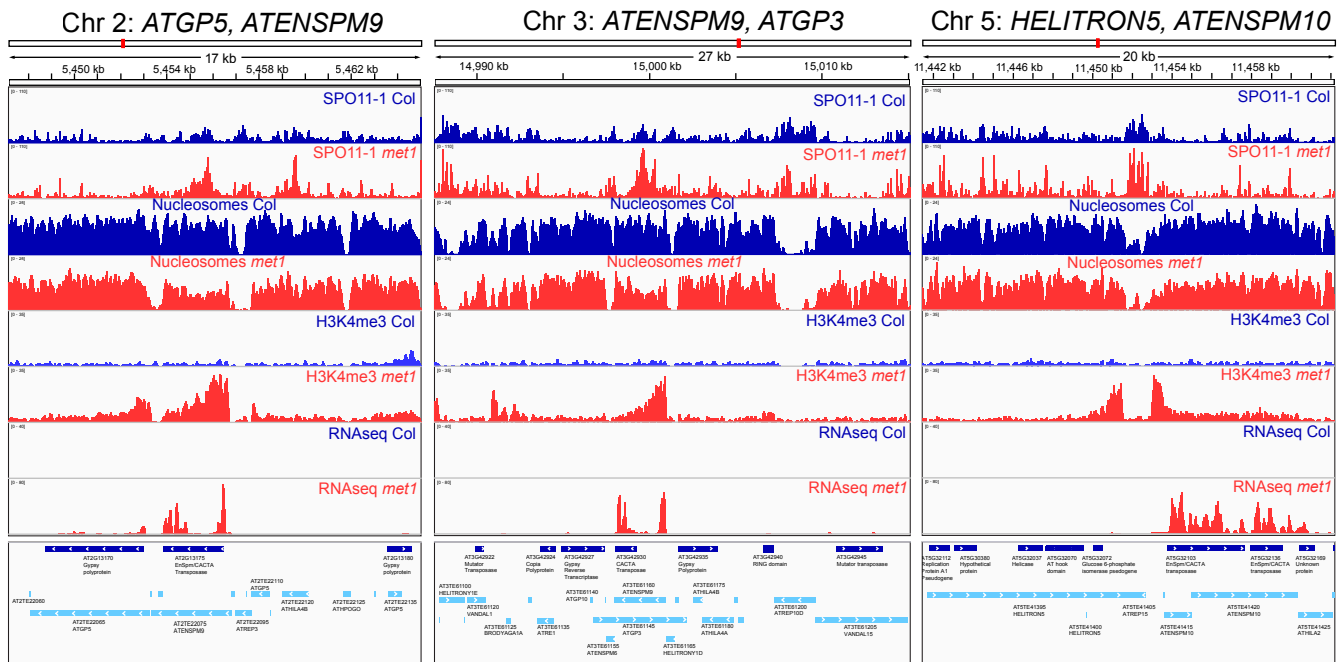

B

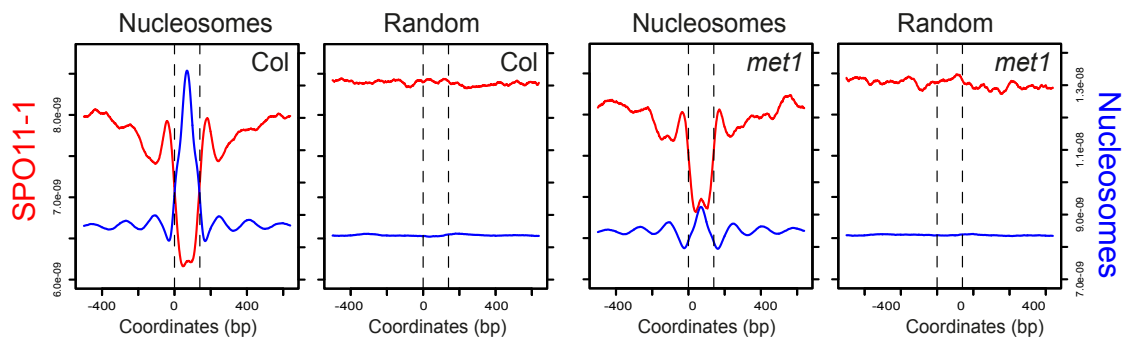

C

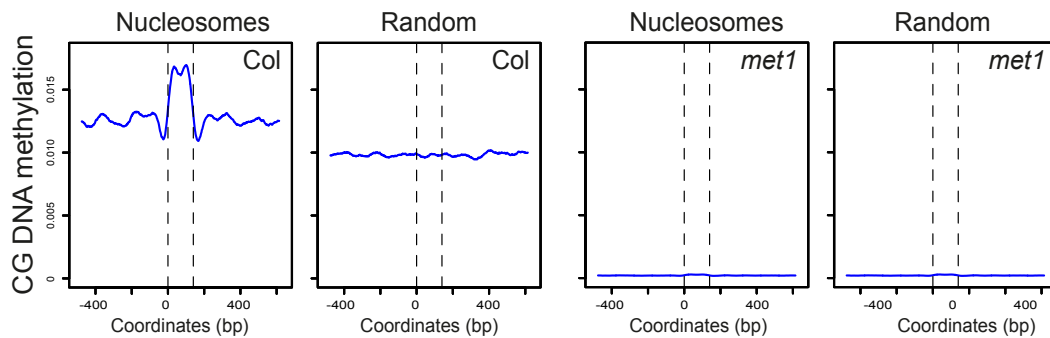

527 **Figure 7. Fine-scale epigenetic remodeling of *met1* transposon chromatin,**  
528 **transcription and recombination.** (A) Close-up of chromosomal regions showing SPO11-1,  
529 nucleosomes, H3K4<sup>me3</sup> and RNAseq data, relative to gene (dark blue) and transposon (light  
530 blue) annotation, for Col (blue) and *met1* (red). (B) Plots analyzing SPO11-1 (red) and  
531 nucleosomes (blue) in Col and *met1* for highly positioned nucleosomes that are differentially  
532 occupied in *met1* (n=30,267), or the same number of random positions. (C) As for (B), but  
533 analyzing CG DNA methylation (blue) in wild type and *met1*.

534

535

536

537

538

539

540

541

542

543

544

545

546

547

548

549

550

551

552

553 **Discussion**

554 The Arabidopsis meiotic DSB landscape shows both conserved and plant-specific features,  
555 compared with SPO11-oligonucleotide maps generated in fungal and mammalian species  
556 (Pan et al. 2011; Lange et al. 2016; Fowler et al. 2014). Consistent with the absence of  
557 PRDM9 in plants and fungi, Arabidopsis hotspots are more similar to those observed in  
558 budding yeast promoters, which are driven by nucleosome occupancy (Pan et al. 2011; Lam  
559 and Keeney 2015; Wu and Lichten 1994; Fan and Petes 1996). However, Arabidopsis also  
560 shows SPO11-1 hotspots within nucleosome-depleted gene terminators and introns,  
561 indicating that varying gene architectures can influence meiotic DSB patterns between  
562 species. Interestingly, avian crossover hotspots are also observed at both gene promoters  
563 and terminators (Singhal et al. 2015), meaning that recombination hotspots located at gene  
564 3'-ends may be widely conserved.

565

566 Consistent with analysis of yeast and mouse SPO11-oligonucleotides, we do not observe a  
567 strong relationship between H3K4<sup>me3</sup> and DSB levels (Tischfield and Keeney 2012; Lange et  
568 al. 2016). However, as this modification correlates positively with plant crossover frequency  
569 (Choi et al. 2013; Liu et al. 2009; Shilo et al. 2015), it is likely that H3K4<sup>me3</sup> plays a  
570 recombination-promoting role downstream of DSB formation, potentially via tethering repair  
571 sites to the chromosome axis, as in budding yeast and mammals (Sommermeyer et al. 2013;  
572 Borde et al. 2009; Acquaviva et al. 2013; Imai et al. 2017). No evidence for PRDM9-like  
573 proteins exist in plants, which acts to direct recombination hotspots to specific sequence  
574 motifs in mammals (Lange et al. 2016; Mihola et al. 2009; Parvanov et al. 2010; Myers et al.  
575 2010; Baudat et al. 2010; Grey et al. 2011; Brick et al. 2012; Grey et al. 2017). However, we  
576 observe a strong influence of AT-sequence richness on SPO11-1 levels. As AT-richness  
577 excludes nucleosomes (Segal and Widom 2009), we propose that these motifs allow

578 increased SPO11-1 access to DNA, and this underlies their association with elevated  
579 crossover frequency (Shilo et al. 2015; Choi et al. 2013; Wijnker et al. 2013).

580

581 Several additional differences are notable between the budding yeast and Arabidopsis  
582 genomes when comparing their DSB landscapes. First is the possession of point versus  
583 regional centromeres (Bloom 2014; Copenhagen et al. 1999; Vincenten et al. 2015), and that  
584 Arabidopsis contains a larger and more diverse transposon complement (Buisine et al. 2008;  
585 Quadrana et al. 2016; Stuart et al. 2016). Arabidopsis transposons are enriched in  
586 pericentromeric heterochromatin and are transcriptionally silenced by DNA methylation  
587 (Saze et al. 2003; Kato et al. 2003), which is a chromatin modification not present in budding  
588 or fission yeast. Using the *met1* mutant we show that loss of maintenance of CG DNA  
589 methylation causes coordinated gain of euchromatic marks, transcription and SPO11-1  
590 DSBs within Arabidopsis centromeric regions. Gain of meiotic DSBs in *met1* was greatest in  
591 coldspot transposons, including the EnSpm/CACTA and Gypsy families. Hence, DNA  
592 methylation simultaneously silences transcription and initiation of meiotic recombination in  
593 specific families of Arabidopsis transposons. This finding is reminiscent of increased SPO11-  
594 DSBs detected in specific retrotransposon classes in mouse *dnmt3l* DNA methylation  
595 mutants (Zamudio et al. 2015), indicating that epigenetic silencing of transposon  
596 recombination is a conserved feature of plant and mammalian genomes.

597

598 Despite the expectation that transposons would be recombination-suppressed, in order to  
599 avoid genome instability (Sasaki et al. 2010), we show that specific Arabidopsis DNA  
600 transposons contain strong meiotic DSB hotspots. These DNA transposons are AT-rich and  
601 nucleosome-depleted in wild type and frequently occur in close proximity to genes. As  
602 Helitrons and Pogo/Tc1/Mariner transposons display TA and AT dinucleotide insertion site  
603 preferences (Guernonprez et al. 2008; Kapitonov and Jurka 2001), this likely contributes to

604 their enrichment in AT-rich gene regulatory regions, where they may further contribute to  
605 nucleosome exclusion and enhanced SPO11-1 DSB levels. Higher meiotic recombination  
606 initiation may also be responsible for DSB hotspot transposons tending to occur as shorter,  
607 non-autonomous fragments. For example, insertions, deletions and rearrangements can  
608 result from non-allelic recombination between repeated loci (Sasaki et al. 2010). Together,  
609 these data reveal unexpected diversity in the chromatin and recombination landscapes  
610 between Arabidopsis transposable element families. As plant genomes vary greatly in the  
611 abundance and chromosomal distributions of specific transposon families (Buisine et al.  
612 2008; Choulet et al. 2014; Guermonprez et al. 2008; Kapitonov and Jurka 2001; Quadrana et  
613 al. 2016; Stuart et al. 2016; Liu et al. 2009), repetitive elements may contribute to diversity of  
614 meiotic recombination patterns between species.

615

616 A role for transposons modifying transcription in proximity to genes is well established,  
617 consistent with Barbara McClintock's 'Controlling Elements' concept (Slotkin and  
618 Martienssen 2007; McClintock 1956). Here we demonstrate that transposons also shape the  
619 meiotic DSB and chromatin landscape, within Arabidopsis gene regulatory regions. We  
620 propose that nucleosome-depleted SPO11-1 hotspot transposons may provide an adaptive  
621 function within plant genomes, by acting as recombination-enhancers. This may be  
622 particularly important at the diverse NBS-LRR resistance gene family, which participate in  
623 host-pathogen coevolution (Jones and Dangl 2006). Interestingly, these immune loci are also  
624 known regions of high genetic and epigenetic divergence between Arabidopsis populations  
625 (Alonso-Blanco et al. 2016; Kawakatsu et al. 2016). We propose that hotspot transposons  
626 directly contribute to this diversity by recruiting SPO11-1-dependent DSBs during meiosis.  
627 Together, our work reveals novel mechanisms whereby mobile genetic elements can  
628 influence meiotic recombination, chromatin, diversity and adaptation in their host genomes.

629



630 **Methods**

631

632 **Generation of Arabidopsis *SPO11-1-Myc spo11-1* lines**

633 Six c-Myc (6xMyc) epitopes were translationally fused to a genomic clone of the *SPO11-1*  
634 gene in the pPZP211 binary vector, which was transformed into wild type Arabidopsis (Col-0)  
635 using *Agrobacterium tumefaciens* strain GV3101, via floral dipping. *SPO11-1-Myc*  
636 transformants were crossed with *spo11-1-3* (SALK\_146172) heterozygotes to perform fertility  
637 complementation tests(Hartung et al. 2007).

638

639 **Recombination measurements using fluorescent seed and pollen**

640 Crossover measurements using fluorescent seed or pollen were carried out as  
641 described(Ziolkowski et al. 2015; Yelina et al. 2013).

642

643 **Immunocytological analysis**

644 Chromosome spreads of Arabidopsis pollen mother cells and immunostaining of ASY1 and  
645 *SPO11-1-Myc* were performed using fresh buds, as described(Armstrong et al. 2002). The  
646 following antibodies were used:  $\alpha$ -ASY1(Armstrong et al. 2002), (rabbit, 1/500 dilution),  $\alpha$ -  
647 Myc (9E10, Santa Cruz Biotechnology) (mouse, 1/50 dilution). Microscopy was conducted  
648 using a DeltaVision Personal DV microscope (Applied precision/GE Healthcare) equipped  
649 with a CDD Coolsnap HQ2 camera (Photometrics). Image capture and analysis was  
650 performed using SoftWoRx software version 5.5 (Applied precision/GE Healthcare).

651

652 **Immunoprecipitation of *SPO11-1*-oligonucleotide complexes**

653 Approximately 30 grams of *SPO11-1-Myc spo11-1-3* floral buds were ground to a fine  
654 powder in liquid nitrogen and resuspended in 4 volumes of lysis buffer (25 mM HEPES-  
655 NaOH pH 7.9, 5 mM EDTA, 1.2% SDS, 1 mM PMSF, 2 mM DTT, 1xRoche Complete

656 Protease Inhibitor Cocktail). The lysis solution was boiled for 20 minutes, followed by rapid  
657 chilling on ice. Centrifugation at 4,000g for 20 min at 4°C was performed twice and the final  
658 supernatant diluted 4-fold by adding 10 mM Tris-HCl pH 8.0, 150 mM NaCl, 1% Triton-X 100.  
659 100 µg of c-Myc Antibody (9E10, sc-40, Santa Cruz) were added to the diluted extract (~160  
660 ml) in 15 ml tubes and incubated for 8 hours at 4°C with rotation. 1.6 ml of 50% Protein G-  
661 Sepharose slurry (71-7083-00, GE Healthcare) was added and incubated overnight at 4°C  
662 with rotation. A mock control (no antibody) was performed to validate immunoprecipitation  
663 efficiency and specificity at small scale, using western blotting with mouse monoclonal c-Myc  
664 antibodies (9E10, sc-40, Santa Cruz) or c-Myc Antibody HRP conjugates (sc-40 HRP, Santa  
665 Cruz). Following immunoprecipitation, protein G beads were collected by centrifugation at  
666 500g for 1 minute and washed five times with wash buffer (1% Triton X-100, 15 mM Tris-HCl,  
667 pH 8.0, 150 mM NaCl, 1 mM EDTA). Immunocomplexes were eluted from the Protein G  
668 beads by incubation at 70°C for 15 minutes in 2 volumes of elution buffer (100 mM Tris-Cl, 1  
669 mM CaCl<sub>2</sub>, 10 mM EDTA, 0.5 % SDS). 20 µg/ml of proteinase K was added to the beads and  
670 incubated at 50°C for 4 hours with occasional mixing. An equal volume of phenol/chloroform  
671 was added to beads, vortexed and centrifuged at 16,000g for 10 minutes. The supernatant  
672 was transferred to a fresh 1.5 ml tube and phenol/chloroform extraction was repeated.  
673 SPO11-1-oligonucleotides were precipitated using 0.1 volume of 3 M sodium acetate pH 5.2,  
674 7.5 µg of glycoblue (Ambion AM9515) and an equal volume of isopropanol, followed by  
675 incubation at -80°C for 2 hours. SPO11-1-oligonucleotides were collected by centrifugation at  
676 16,000g for 45 minutes at 4°C. After two 80% ethanol rinses the pellet was air-dried and  
677 resuspended in 30µl of distilled water. 40µl of 2×formamide loading buffer (80% deionized  
678 formamide, 10 mM EDTA, pH 8.0, 0.5 mg/ml xylene cyanol FF, 10% saturated bromophenol  
679 blue) were added, mixed and incubated at 70°C for 5 minutes. SPO11-1-oligonucleotides  
680 and a 20 bp ladder were separated using a 10% TBE-Urea gel (Invitrogen EC6875BOX) and  
681 stained by SYBR® Gold Nucleic Acid Gel Stain (Molecular Probes S-11494) for 3 minutes

682 with gentle shaking. The gel region corresponding to 35–50 nt was excised, macerated and  
683 soaked in 10 mM Tris (pH 8.0) overnight at 37°C with rotation. The gel fragments were  
684 removed by SpinX-centrifuge tube filters (Costar 8163) and the eluate was transferred to  
685 fresh 1.5 ml tubes. 0.3 volume of 9 M ammonium acetate, 7.5 µg of glycoblu and 2.5  
686 volumes of 100% ethanol were added, mixed and incubated at -80°C for 2 hours. The size-  
687 selected SPO11-1-oligonucleotides were centrifuged at 16,000g for 45 minutes as above,  
688 rinsed twice by 80% ethanol, air-dried and dissolved in 40 µl of distilled water.

689

690 For end-labelling experiments an aliquot (50 µl) of Protein G beads reserved from the  
691 immunoprecipitation was washed twice with 1×terminal deoxynucleotidyl transferase (TdT)  
692 buffer (50 mM potassium acetate, 20 mM Tris-acetate, 10 mM magnesium acetate, pH 7.9),  
693 and incubated with 15 units of TdT (M0315L, NEB), 50 µCi [ $\alpha$ -<sup>32</sup>P]-dCTP triphosphate  
694 (5,000 Ci/mmol) and 5 µl of 10×TdT buffer, in a total volume of 50 µl, for 30 minutes at 37°C.  
695 The beads were washed three times with wash buffer. SPO11-1-oligonucleotide complexes  
696 were eluted by boiling for 3 minutes in 50 µl of 2×Laemmli buffer and separated using a 10%  
697 SDS-PAGE gel. The gel was vacuum-dried and radioactivity was detected by exposing to a  
698 phosphoimager screen.

699

#### 700 **SPO11-1-oligonucleotide library construction**

701 Approximately 1 pmol of purified SPO11-1-oligonucleotides were used for GTP tailing at their  
702 3'-ends. Conditions were used such that between 3 and 5 GMP residues were added per  
703 oligonucleotide. A 40 µl reaction was used containing 1×TdT buffer (50 mM potassium  
704 acetate, 20 mM Tris-acetate, 10 mM magnesium acetate, pH 7.9), 20 units of TdT (M0315L,  
705 NEB), and 2 mM GTP at 37°C for 6 hours. TdT was inactivated by incubating at 75°C for 10  
706 minutes. The G-tailed oligonucleotides were precipitated by incubating with 2.5 volumes of  
707 100% ethanol and 0.3 volumes of 9 M ammonium acetate at -80°C for 2 hours, followed by

708 centrifugation at 16,000g for 45 minutes, washing twice with 80% ethanol, air-drying and  
709 resuspension in 20  $\mu$ l of distilled water. G-tailed SPO11-1-oligonucleotides were ligated to a  
710 double-stranded DNA adapter in a 40  $\mu$ l reaction of 1 $\times$ T4 RNA ligase 2 buffer (50 mM Tris-  
711 HCl pH 7.5, 2 mM MgCl<sub>2</sub>, 1 mM DTT, 400  $\mu$ M ATP), 10 pmol double-stranded 3' adapter (3'-  
712 adapter: top strand, 5'-pTGAATTCTCGGGTGCCAAGGddC-3', bottom strand, 5'-  
713 AGCCTTGGCACCCGAGAATTCCACCC-3') (Supplementary Table 14) and 20 units of T4  
714 RNA ligase 2 (dsRNA ligase) (M0239L, NEB) overnight at room temperature. To synthesize  
715 complementary strands of SPO11-1-oligonucleotides, 30  $\mu$ M dNTP and 10 units of Klenow  
716 polymerase (NEB) were added to the ligation reaction, incubated at 25°C for 15 minutes,  
717 followed by 70°C for 10 minutes. 0.3 volumes of 9 M ammonium acetate, 5  $\mu$ g of glycoblue  
718 and 2.5 volumes of 100% ethanol were added, and DNA precipitated at -80°C for 2 hours,  
719 followed by centrifugation at 16,000g. The pellet was washed twice with 80% ethanol, air-  
720 dried and re-dissolved in 20  $\mu$ l of water. 30  $\mu$ l of formamide loading buffer was added, mixed  
721 and incubated at 70°C for 5 minutes. The denatured products were separated by  
722 electrophoresis using a 10% TBE-Urea gel, and the gel region between 60–80 nt (equivalent  
723 to 32–52 nt SPO11-1-oligonucleotides with (rG)3-5 tails and a ligated 23 nucleotide adapter)  
724 was excised, macerated and rotated overnight at 37°C overnight in 400  $\mu$ l of 10 mM Tris-  
725 HCl, pH 8.0. The buffer containing dissolved SPO11-1-oligonucleotides was centrifuged  
726 through SpinX-centrifuge tube filters. 0.3 volumes of 9 M ammonium acetate, 10  $\mu$ g of  
727 glycoblue, and 2.5 volumes of 100% ethanol were added and DNA was precipitated at -80°C  
728 for 2 hours, followed by centrifugation at 16,000g for 45 minutes. The pellet was washed  
729 twice with 70% ethanol and air-dried. The 3'-ends of gel-purified denatured DNA strands  
730 were tailed with GTP by dissolving the dried pellet in a 40  $\mu$ l tailing reaction containing 1 $\times$ TnT  
731 buffer, 30 units of TdT, and 50  $\mu$ M GTP, then incubating at 37°C for 6 hours and at 70°C for  
732 10 minutes. The G-tailed products were precipitated with 0.3 volumes of 9 M ammonium  
733 acetate, 10  $\mu$ g of glycoblue, and 2.5 volumes of 100% ethanol at -80°C for 2 hours, followed

734 by centrifugation at 16,000g for 45 minutes. After washing with 70% ethanol twice, the air-  
735 dried pellet was dissolved in 20 µl of distilled water and incubated in 40 µl of 1×T4 RNA  
736 ligase 2 buffer, 10 pmol double-stranded DNA adapter (5' adapter: top strand, 5'-  
737 pATCGTCGGACTGTAGAACTCTGAAddC-3'. bottom strand, 5'-  
738 AGTTCAGAGTTCTACAGTCCGACGATCCC-3') (Supplementary Table 14) and 30 units of  
739 T4 RNA ligase2 at room temperature overnight. Finally 30 µM dNTP and 10 units of Klenow  
740 polymerase were added and incubated at 25°C for 15 minutes, followed by 70°C for 10  
741 minutes.

742

743 A test PCR was performed using a total reaction volume of 20 µl with 1/50 of the final Klenow  
744 reaction, 1×FailSafe™ PCR 2×PreMix E (FSP995E, Epicentre), 1µl of Pfu Ultra II Fusion HS  
745 DNA Polymerase (Catalog #600672, Agilent) and 1 µM primers RP1 and RPI1. The reaction  
746 mixture was divided into two tubes, and PCR performed at 94°C for 20 seconds, followed by  
747 20 cycles of {94°C for 10 seconds; 60°C for 30 seconds; 72°C for 15 seconds}. 5 µl of the  
748 PCR products were separated using a 10% TBE gel (EC6275BOX, Invitrogen) with a PCR  
749 20 bp low ladder (P1598, Sigma-Aldrich) and stained with SYBR gold to determine the size  
750 and quantity of PCR products. PCRs were then scaled up to a total volume of 400 µl. This  
751 mixture was divided into 10 µl aliquots, denatured at 94°C for 10 seconds and amplified for  
752 16 cycles of {94°C for 10 seconds; 60°C for 30 seconds; 72°C for 15 seconds}. PCR  
753 products were pooled and precipitated using 0.3 volumes of 9 M ammonium acetate, 7.5 µg  
754 of glycoblu and 2.5 volumes of 100% ethanol. The PCR products were separated by  
755 electrophoresis using a 10% TBE gel, and the gel area corresponding to 160–180 bp was  
756 excised, macerated and soaked in 400 µl of 10 mM Tris, pH 8.0 at 37°C overnight, with  
757 mixing. The eluate was spun through a SpinX-centrifuge tube filter and DNA was precipitated  
758 using 0.3 volume of 9 M ammonium acetate, 7.5 µg of glycoblu and 2.5 volumes of 100%

759 ethanol. The air-dried DNA pellet was dissolved in 30  $\mu$ l of 10 mM Tris, pH 8.0. Sequencing  
760 was performed using an Illumina NextSeq instrument.

761

### 762 **MNase and H3K4<sup>me3</sup> chromatin immunoprecipitation sequencing**

763 Micrococcal nuclease digestion and sequencing library construction were performed as  
764 reported(Choi et al. 2016). For ChIP two grams of unopened floral buds were ground in liquid  
765 nitrogen. Nuclei were isolated and *in vitro* cross-linked in nuclear isolation crosslinking buffer  
766 (60 mM Hepes pH 8.0, 1 M sucrose, 5 mM KCl, 5 mM MgCl<sub>2</sub>, 5 mM EDTA, 0.6% Triton X-  
767 100, 0.4 mM PMSF, 1  $\mu$ g pepstatin, 1 $\times$ protein inhibitor cocktails, 1% formaldehyde) at room  
768 temperature for 25 minutes. Glycine was added to a final concentration of 125 mM and  
769 incubated for 25 minutes at room temperature with rotation. Cross-linked bud lysate was  
770 filtered through one layer of Miracloth and centrifuged at 2,000g at 4°C for 20 minutes. The  
771 pellet was resuspended in extraction buffer (0.25 M sucrose, 10 mM Tris-HCl pH 8.0, 10 mM  
772 MgCl<sub>2</sub>, 1% Triton X-100, 1 mM EDTA, 5 mM  $\beta$ -mercaptoethanol, 0.1 mM PMSF,  
773 1 $\times$ proteinase inhibitor cocktails) and centrifuged at 2,000g at 4°C for 15 minutes. The nuclei  
774 pellet was rinsed with 1 ml of TNE buffer (10 mM Tris-HCl pH 8.0, 10 mM NaCl, 1 mM EDTA,  
775 1 $\times$ proteinase inhibitor cocktails), resuspended and then centrifuging at 2,000g at 4°C for 5  
776 minutes. Cross-linked chromatin was digested with 0.05 units of micrococcal nuclease  
777 (MNase, NEB M0247S) in reaction buffer (10 mM Tris-HCl, pH 8.0, 10 mM NaCl, 1 mM  
778 EDTA, 4 mM CaCl<sub>2</sub>) at 37°C for 15 minutes with vortexing. The reaction was stopped by  
779 adding EDTA to a final concentration of 20 mM, vortexing and placing on ice for 10 minutes.  
780 One volume of 10 mM Tris-pH 8, 0.2% SDS, 2% Triton X-100, 0.2% sodium deoxycholate,  
781 1 $\times$ proteinase inhibitor cocktails was added and rotated for 2 hours at 4°C. The reactions  
782 were centrifuged at 14,000g in a microfuge for 5 minutes at 4°C. The supernatant was used  
783 for immunoprecipitation overnight at 4°C using Dynabeads Protein G that were pre-bound to  
784 5  $\mu$ g H3K4<sup>me3</sup> antibody (AbCam ab8580). The chromatin immunocomplexes were washed,

785 eluted and reverse-crosslinked. The immunoprecipitates were further purified by  
786 phenol/chlorophorm/isoamyl alcohol (24:24:1) extraction, followed by ethanol precipitation  
787 and 2% agarose gel separation and gel extraction of ~145–150 bp DNA. Approximately 10  
788 ng of ChIP-purified DNA was used to generate a library using the TruSeq Prep Kit v2  
789 (Illumina). Libraries were subjected to paired-end sequenced using an Illumina NextSeq  
790 instrument.

791

### 792 **RNA-sequencing**

793 Five µg of total RNA from unopened flower buds were extracted using Trizol reagent. To  
794 perform rRNA depletion we used the Ribo-Zero magnetic kit (MRZPL116). Fifty ng of rRNA-  
795 depleted RNA were used for RNA-seq library construction using the ScriptSeq v2 RNA-seq  
796 Library Preparation Kit (SSV21124). The library was amplified using 12 PCR cycles and  
797 indexed using ScriptSeq Index PCR Primers (RSBC10948) and FailSafe™ PCR Enzyme  
798 Mix (FSE51100). Sequencing was performed on a HiSeq instrument. RNA-seq data were  
799 analyzed using RSEM.

800

### 801 **Bioinformatics analysis of SPO11-1-oligonucleotides, ChIP-seq and MNase-seq data**

802 For SPO11-1-oligonucleotide data FASTQ files were trimmed for 3'-adapter sequences using  
803 the FASTX-Toolkit function `fastx_clipper` ([http://hannonlab.cshl.edu/fastx\\_toolkit/](http://hannonlab.cshl.edu/fastx_toolkit/)). For the  
804 wild type libraries RPI1 and RPI3 5 bp were trimmed from the read 5'-ends, while for other  
805 libraries 10 bp were cropped, due to longer adapter sequences. Trimmed reads were aligned  
806 to the TAIR10 reference sequence using `bowtie2` with the following settings: `--very-sensitive`  
807 `-p 4 -k 10`. Aligned reads were filtered to have 2 or fewer mismatches. Reads with the SAM  
808 optional field "XS:i" were dropped to obtain unique alignments. Reads with multiple valid  
809 alignments were filtered for MAPQ scores of 10 or higher, and the highest value alignment  
810 kept. In the event that a read had multiple alignments with equal MAPQ scores, one was

811 randomly chosen. Unique and multiply aligning reads were then deduplicated using  
812 SAMtools. BAM files for uniquely and multiply aligning reads were combined. For MNase-seq  
813 and ChIP-seq data paired-end FASTQ files were directly aligned to the TAIR10 reference  
814 sequence using bowtie2 with the following settings --very-sensitive --no-discordant --no-  
815 mixed -p 4 -k 10. To obtain uniquely aligning reads, reads with the SAM optional field "XS:i"  
816 and MAPQ scores of less than 42 were dropped. To ensure reads were kept in proper pairs,  
817 a Python script was applied. Reads with multiple valid alignments were filtered for those with  
818 MAPQ scores of 10 or higher and the highest value alignments kept. Multiply aligning reads  
819 were treated as for SPO11-1-oligonucleotides. Unique and multiply aligning reads were then  
820 deduplicated using SAMtools, combined and used for downstream analysis. Coverage  
821 values from these reads were calculated using Rsamtools and normalized by the sum of  
822 coverage per library. Analysis of these data in relation to features including TAIR10  
823 representative gene TSS and TTS and transposons(Buisine et al. 2008), was performed as  
824 previously described (Choi et al. 2013). For hexile analysis normalized values of SPO11-1-  
825 oligonucleotides were calculated in windows -500 bp upstream of TSS for promoters or +500  
826 bp downstream of TTS for terminators. These regions were also measured for nucleosome  
827 occupancy and AT-rich motif matches. These were compared with H3K4<sup>me3</sup> and CTT motif  
828 matches in the 500 bp downstream of TSS and upstream of TTS. To test the extent of  
829 SPO11-1-oligonucleotide hexile overlap with crossovers, we used a set of 2,499 crossovers  
830 mapped using genotyping-by-sequencing in Col×Ler F<sub>2</sub> individuals(Choi et al. 2016; Yelina et  
831 al. 2015). SPO11-1 levels were calculated within each SNP interval used to detect  
832 crossovers. Intervals were also classified according to their overlap with genomic annotation  
833 and position along chromosomes in 2 megabase bands. Data were modeled with the glm  
834 function in R, using the binomial family and a logistic link function.

835

836



837 **Data Access**

838 The FASTQ files associated with the genomic datasets described here have been uploaded  
839 to the ArrayExpress repositories, and can be accessed using the provided usernames and  
840 passwords.

841 SPO11-1-oligonucleotides: <https://www.ebi.ac.uk/arrayexpress/experiments/E-MTAB-5041/>

842 Username: Reviewer\_E-MTAB-5041 Password: MKE8bvew

843 Nucleosome MNase-seq: <https://www.ebi.ac.uk/arrayexpress/experiments/E-MTAB-5042/>

844 Username: Reviewer\_E-MTAB-5042 Password: 4c0zvhju

845 H3K4<sup>me3</sup> ChIP-seq: <https://www.ebi.ac.uk/arrayexpress/experiments/E-MTAB-5048/>

846 Username: Reviewer\_E-MTAB-5048 Password: 4c0zvhju

847 RNA-seq: <https://www.ebi.ac.uk/arrayexpress/experiments/E-MTAB-5417/>

848 Username: Reviewer\_E-MTAB-5417 Password: 2rX8I48v

849

850 **Acknowledgements**

851 Research was supported by a Royal Society University Research Fellowship, the Gatsby  
852 Charitable Foundation grant GAT2962, BBSRC grant BB/N007557/1, National Natural  
853 Science Foundation of China grant 61403318, Next-Generation BioGreen Program (SSAC  
854 grant PJ01137901 RDA Korea) and an EMBO long-term postdoctoral fellowship (ALT 807-  
855 2009).

856

857 **Author Contributions**

858 KC, CL, CJU, HS, PAZ, NEY, RAM and IRH contributed to design of the study. KC, CL, CJU  
859 and HS performed experiments. KC, XZ, CL, CJU, TJH, HS, AJT, RAM and IRH analyzed  
860 the data. KC, XZ, CL, CJU, TJH, HS, AJT, PAZ, NEY, RAM and IRH wrote the manuscript.

861

862

863 **References**

- 864 Acquaviva L, Székvölgyi L, Dichtl B, Dichtl BS, de La Roche Saint André C, Nicolas A, Géli  
865 V. 2013. The COMPASS subunit Spp1 links histone methylation to initiation of meiotic  
866 recombination. *Science* **339**: 215–8.
- 867 Alonso-Blanco C, Andrade J, Becker C, Bemm F, Bergelson J, Borgwardt KMM, Cao J,  
868 Chae E, Dezwaan TMM, Ding W, et al. 2016. 1,135 Genomes Reveal the Global  
869 Pattern of Polymorphism in *Arabidopsis thaliana*. *Cell* **166**: 481–491.
- 870 Armstrong SJ, Caryl AP, Jones GH, Franklin FCH. 2002. Asy1, a protein required for meiotic  
871 chromosome synapsis, localizes to axis-associated chromatin in *Arabidopsis* and  
872 *Brassica*. *J Cell Sci* **115**: 3645–55.
- 873 Baker CL, Walker M, Kajita S, Petkov PM, Paigen K. 2014. PRDM9 binding organizes  
874 hotspot nucleosomes and limits Holliday junction migration. *Genome Res* **24**: 724–732.
- 875 Barton NH, Charlesworth B. 1998. Why sex and recombination? *Science* **281**: 1986–90.
- 876 Baudat F, Buard J, Grey C, Fledel-Alon A, Ober C, Przeworski M, Coop G, de Massy B.  
877 2010. PRDM9 is a major determinant of meiotic recombination hotspots in humans and  
878 mice. *Science* **327**: 836–40.
- 879 Baudat F, Imai Y, de Massy B. 2013. Meiotic recombination in mammals: localization and  
880 regulation. *Nat Rev Genet* **14**: 794–806.
- 881 Beauregard A, Curcio MJ, Belfort M. 2008. The Take and Give Between Retrotransposable  
882 Elements and their Hosts. *Annu Rev Genet* **42**: 587–617.
- 883 Berchowitz LE, Copenhaver GP. 2008. Fluorescent *Arabidopsis* tetrads: a visual assay for  
884 quickly developing large crossover and crossover interference data sets. *Nat Protoc* **3**:  
885 41–50.
- 886 Bloom KS. 2014. Centromeric Heterochromatin: The Primordial Segregation Machine. *Annu*  
887 *Rev Genet* **48**: 457–484.
- 888 Borde V, Robine N, Lin W, Bonfils S, Géli V, Nicolas A. 2009. Histone H3 lysine 4  
889 trimethylation marks meiotic recombination initiation sites. *EMBO J* **28**: 99–111.
- 890 Borhan MH, Gunn N, Cooper A, Gulden S, Tör M, Rimmer SR, Holub EB. 2008. WRR4  
891 encodes a TIR-NB-LRR protein that confers broad-spectrum white rust resistance in  
892 *Arabidopsis thaliana* to four physiological races of *Albugo candida*. *Mol Plant Microbe*  
893 *Interact* **21**: 757–68.
- 894 Brick K, Smagulova F, Khil P, Camerini-Otero RD, Petukhova G V. 2012. Genetic  
895 recombination is directed away from functional genomic elements in mice. *Nature* **485**:  
896 642–5.

- 897 Buisine N, Quesneville H, Colot V. 2008. Improved detection and annotation of transposable  
898 elements in sequenced genomes using multiple reference sequence sets. *Genomics*  
899 **91**: 467–75.
- 900 Cheng C-Y, Krishnakumar V, Chan AP, Thibaud-Nissen F, Schobel S, Town CD. 2017.  
901 Araport11: a complete reannotation of the *Arabidopsis thaliana* reference genome. *Plant*  
902 *J* **89**: 789–804.
- 903 Choi K, Henderson IR. 2015. Meiotic recombination hotspots - a comparative view. *Plant J*  
904 **83**: 52–61.
- 905 Choi K, Reinhard C, Serra H, Ziolkowski PA, Underwood CJ, Zhao X, Hardcastle TJ, Yelina  
906 NE, Griffin C, Jackson M, et al. 2016. Recombination Rate Heterogeneity within  
907 *Arabidopsis* Disease Resistance Genes. *PLOS Genet* **12**: e1006179.
- 908 Choi K, Zhao X, Kelly KA, Venn O, Higgins JD, Yelina NE, Hardcastle TJ, Ziolkowski PA,  
909 Copenhaver GP, Franklin FCH, et al. 2013. *Arabidopsis* meiotic crossover hot spots  
910 overlap with H2A.Z nucleosomes at gene promoters. *Nat Genet* **45**: 1327–36.
- 911 Choulet F, Alberti A, Theil S, Glover N, Barbe V, Daron J, Pingault L, Sourdille P, Couloux A,  
912 Paux E, et al. 2014. Structural and functional partitioning of bread wheat chromosome  
913 3B. *Science* **345**: 1249721.
- 914 Cooper TJ, Garcia V, Neale MJ. 2016. Meiotic DSB patterning: A multifaceted process. *Cell*  
915 *Cycle* **15**: 13–21.
- 916 Copenhaver GP, Nickel K, Kuromori T, Benito MI, Kaul S, Lin X, Bevan M, Murphy G, Harris  
917 B, Parnell LD, et al. 1999. Genetic definition and sequence analysis of *Arabidopsis*  
918 centromeres. *Science* **286**: 2468–74.
- 919 De Massy B. 2013. Initiation of meiotic recombination: how and where? Conservation and  
920 specificities among eukaryotes. *Annu Rev Genet* **47**: 563–99.
- 921 Drouaud J, Khademian H, Giraut L, Zanni V, Bellalou S, Henderson IR, Falque M, Mézard C.  
922 2013. Contrasted patterns of crossover and non-crossover at *Arabidopsis thaliana*  
923 meiotic recombination hotspots. *PLoS Genet* **9**: e1003922.
- 924 Fan QQ, Petes TD. 1996. Relationship between nuclease-hypersensitive sites and meiotic  
925 recombination hot spot activity at the HIS4 locus of *Saccharomyces cerevisiae*. *Mol Cell*  
926 *Biol* **16**: 2037–43.
- 927 Feschotte C, Mouchès C. 2000. Evidence that a family of miniature inverted-repeat  
928 transposable elements (MITEs) from the *Arabidopsis thaliana* genome has arisen from  
929 a pogo-like DNA transposon. *Mol Biol Evol* **17**: 730–7.
- 930 Feschotte C, Pritham EJ. 2007. DNA Transposons and the Evolution of Eukaryotic  
931 Genomes. *Annu Rev Genet* **41**: 331–368.

- 932 Fowler KR, Sasaki M, Milman N, Keeney S, Smith GR. 2014. Evolutionarily diverse  
933 determinants of meiotic DNA break and recombination landscapes across the genome.  
934 *Genome Res* **24**: 1650–64.
- 935 Fu H, Zheng Z, Dooner HK. 2002. Recombination rates between adjacent genic and  
936 retrotransposon regions in maize vary by 2 orders of magnitude. *Proc Natl Acad Sci U S*  
937 *A* **99**: 1082–1087.
- 938 Garcia V, Phelps SEL, Gray S, Neale MJ. 2011. Bidirectional resection of DNA double-strand  
939 breaks by Mre11 and Exo1. *Nature* **479**: 241–4.
- 940 Giraut L, Falque M, Drouaud J, Pereira L, Martin OC, Mézard C. 2011. Genome-wide  
941 crossover distribution in *Arabidopsis thaliana* meiosis reveals sex-specific patterns  
942 along chromosomes. *PLoS Genet* **7**: e1002354.
- 943 Grelon M, Vezon D, Gendrot G, Pelletier G. 2001. AtSPO11-1 is necessary for efficient  
944 meiotic recombination in plants. *EMBO J* **20**: 589–600.
- 945 Grey C, Barthès P, Chauveau-Le Friec G, Langa F, Baudat F, de Massy B. 2011. Mouse  
946 PRDM9 DNA-binding specificity determines sites of histone H3 lysine 4 trimethylation  
947 for initiation of meiotic recombination. *PLoS Biol* **9**: e1001176.
- 948 Grey C, Clément JAJ, Buard J, Leblanc B, Gut I, Gut M, Duret L, de Massy B. 2017. In vivo  
949 binding of PRDM9 reveals interactions with noncanonical genomic sites. *Genome Res*  
950 **27**: 580–590.
- 951 Guernonprez H, Loot C, Casacuberta JM. 2008. Different strategies to persist: the pogo-like  
952 Lemi1 transposon produces miniature inverted-repeat transposable elements or typical  
953 defective elements in different plant genomes. *Genetics* **180**: 83–92.
- 954 Hamilton W. 2002. *Narrow Roads Of Gene Land, Volume 2: Evolution Of Sex*. Oxford  
955 University Press, Oxford.
- 956 Hartung F, Wurz-Wildersinn R, Fuchs J, Schubert I, Suer S, Puchta H. 2007. The  
957 catalytically active tyrosine residues of both SPO11-1 and SPO11-2 are required for  
958 meiotic double-strand break induction in *Arabidopsis*. *Plant Cell* **19**: 3090–9.
- 959 Hellsten U, Wright KM, Jenkins J, Shu S, Yuan Y, Wessler SR, Schmutz J, Willis JH,  
960 Rokhsar DS. 2013. Fine-scale variation in meiotic recombination in *Mimulus* inferred  
961 from population shotgun sequencing. *Proc Natl Acad Sci U S A* **110**: 19478–82.
- 962 Horton MW, Hancock AM, Huang YS, Toomajian C, Atwell S, Auton A, Mulyati NW, Platt A,  
963 Sperone FG, Vilhjálmsson BJ, et al. 2012. Genome-wide patterns of genetic variation in  
964 worldwide *Arabidopsis thaliana* accessions from the RegMap panel. *Nat Genet* **44**: 212–  
965 6.
- 966 Imai Y, Baudat F, Taillepierre M, Stanzione M, Toth A, de Massy B. 2017. The PRDM9  
967 KRAB domain is required for meiosis and involved in protein interactions. *Chromosoma*.

- 968 Jones JDG, Dangl JL. 2006. The plant immune system. *Nature* **444**: 323–329.
- 969 Kankel MW, Ramsey DE, Stokes TL, Flowers SK, Haag JR, Jeddeloh JA, Riddle NC,  
970 Verbsky ML, Richards EJ. 2003. Arabidopsis MET1 cytosine methyltransferase  
971 mutants. *Genetics* **163**: 1109–1122.
- 972 Kapitonov V V, Jurka J. 2001. Rolling-circle transposons in eukaryotes. *Proc Natl Acad Sci U*  
973 *S A* **98**: 8714–9.
- 974 Kato M, Miura A, Bender J, Jacobsen SE, Kakutani T. 2003. Role of CG and non-CG  
975 methylation in immobilization of transposons in Arabidopsis. *Curr Biol* **13**: 421–6.
- 976 Kauppi L, Jeffreys AJ, Keeney S. 2004. Where the crossovers are: recombination  
977 distributions in mammals. *Nat Rev Genet* **5**: 413–24.
- 978 Kawakatsu T, Huang S-SC, Jupe F, Sasaki E, Schmitz RJ, Urich MA, Castanon R, Nery JR,  
979 Barragan C, He Y, et al. 2016. Epigenomic Diversity in a Global Collection of  
980 Arabidopsis thaliana Accessions. *Cell* **166**: 492–505.
- 981 Keeney S, Giroux CN, Kleckner N. 1997. Meiosis-specific DNA double-strand breaks are  
982 catalyzed by Spo11, a member of a widely conserved protein family. *Cell* **88**: 375–84.
- 983 Keeney S, Kleckner N. 1995. Covalent protein-DNA complexes at the 5' strand termini of  
984 meiosis-specific double-strand breaks in yeast. *Proc Natl Acad Sci U S A* **92**: 11274–8.
- 985 Kong A, Thorleifsson G, Gudbjartsson DF, Masson G, Sigurdsson A, Jonasdottir A, Walters  
986 GB, Jonasdottir A, Gylfason A, Kristinsson KT, et al. 2010. Fine-scale recombination  
987 rate differences between sexes, populations and individuals. *Nature* **467**: 1099–103.
- 988 Lam I, Keeney S. 2014. Mechanism and Regulation of Meiotic Recombination Initiation. *Cold*  
989 *Spring Harb Perspect Biol* **7**: a016634.
- 990 Lam I, Keeney S. 2015. Nonparadoxical evolutionary stability of the recombination initiation  
991 landscape in yeast. *Science* **350**: 932–7.
- 992 Lange J, Yamada S, Tischfield SE, Pan J, Kim S, Zhu X, Socci ND, Jasin M, Keeney S.  
993 2016. The Landscape of Mouse Meiotic Double-Strand Break Formation, Processing,  
994 and Repair. *Cell* **167**: 695–708.e16.
- 995 Liu S, Yeh C-T, Ji T, Ying K, Wu H, Tang HM, Fu Y, Nettleton D, Schnable PS. 2009. Mu  
996 Transposon Insertion Sites and Meiotic Recombination Events Co-Localize with  
997 Epigenetic Marks for Open Chromatin across the Maize Genome. *PLoS Genet* **5**: 13.
- 998 Malik HS, Henikoff S. 2009. Major Evolutionary Transitions in Centromere Complexity. *Cell*  
999 **138**: 1067–1082.
- 1000 Mathieu O, Reinders J, Caikovski M, Smathajitt C, Paszkowski J. 2007. Transgenerational  
1001 stability of the Arabidopsis epigenome is coordinated by CG methylation. *Cell* **130**: 851–  
1002 62.

- 1003 McClintock B. 1956. Controlling Elements and the Gene. *Cold Spring Harb Symp Quant Biol*  
1004 **21**: 197–216.
- 1005 Mihola O, Trachtulec Z, Vleck C, Schimenti JC, Forejt J. 2009. A mouse speciation gene  
1006 encodes a meiotic histone H3 methyltransferase. *Science* **323**: 373–5.
- 1007 Myers S, Bottolo L, Freeman C, McVean G, Donnelly P. 2005. A fine-scale map of  
1008 recombination rates and hotspots across the human genome. *Science* **310**: 321–4.
- 1009 Myers S, Bowden R, Tumian A, Bontrop RE, Freeman C, MacFie TS, McVean G, Donnelly  
1010 P. 2010. Drive against hotspot motifs in primates implicates the PRDM9 gene in meiotic  
1011 recombination. *Science* **327**: 876–9.
- 1012 Myers S, Freeman C, Auton A, Donnelly P, McVean G. 2008. A common sequence motif  
1013 associated with recombination hot spots and genome instability in humans. *Nat Genet*  
1014 **40**: 1124–9.
- 1015 Neale MJ, Keeney S. 2009. End-labeling and analysis of Spo11-oligonucleotide complexes  
1016 in *Saccharomyces cerevisiae*. *Methods Mol Biol* **557**: 183–95.
- 1017 Neale MJ, Pan J, Keeney S. 2005. Endonucleolytic processing of covalent protein-linked  
1018 DNA double-strand breaks. *Nature* **436**: 1053–7.
- 1019 Nicolas A, Treco D, Schultes NP, Szostak JW. 1989. An initiation site for meiotic gene  
1020 conversion in the yeast *Saccharomyces cerevisiae*. *Nature* **338**: 35–9.
- 1021 Pan J, Sasaki M, Kniewel R, Murakami H, Blitzblau HG, Tischfield SE, Zhu X, Neale MJ,  
1022 Jasin M, Socci ND, et al. 2011. A hierarchical combination of factors shapes the  
1023 genome-wide topography of yeast meiotic recombination initiation. *Cell* **144**: 719–31.
- 1024 Parvanov ED, Petkov PM, Paigen K. 2010. Prdm9 controls activation of mammalian  
1025 recombination hotspots. *Science* **327**: 835.
- 1026 Powers NR, Parvanov ED, Baker CL, Walker M, Petkov PM, Paigen K. 2016. The Meiotic  
1027 Recombination Activator PRDM9 Trimethylates Both H3K36 and H3K4 at  
1028 Recombination Hotspots In Vivo ed. I.R. Adams. *PLOS Genet* **12**: e1006146.
- 1029 Quadrona L, Bortolini Silveira A, Mayhew GF, LeBlanc C, Martienssen RA, Jeddeloh JA,  
1030 Colot V. 2016. The *Arabidopsis thaliana* mobilome and its impact at the species level.  
1031 *Elife* **5**.
- 1032 Robert T, Nore A, Brun C, Maffre C, Crimi B, Bourbon H-M, de Massy B. 2016. The  
1033 TopoVIB-Like protein family is required for meiotic DNA double-strand break formation.  
1034 *Science (80- )* **351**: 943–949.
- 1035 Rowan BA, Patel V, Weigel D, Schneeberger K. 2015. Rapid and Inexpensive Whole-  
1036 Genome Genotyping-by-Sequencing for Crossover Localization and Fine-Scale Genetic  
1037 Mapping. *G3 (Bethesda)* **5**: 385–98.

- 1038 Salomé PA, Bomblies K, Fitz J, Laitinen RAE, Warthmann N, Yant L, Weigel D. 2012. The  
1039 recombination landscape in *Arabidopsis thaliana* F2 populations. *Heredity (Edinb)* **108**:  
1040 447–55.
- 1041 Sanchez-Moran E, Santos J-L, Jones GH, Franklin FCH. 2007. ASY1 mediates AtDMC1-  
1042 dependent interhomolog recombination during meiosis in *Arabidopsis*. *Genes Dev* **21**:  
1043 2220–33.
- 1044 Sasaki M, Lange J, Keeney S. 2010. Genome destabilization by homologous recombination  
1045 in the germline. *Nat Rev Mol Cell Biol* **11**: 182.
- 1046 Sasaki M, Tischfield SE, van Overbeek M, Keeney S. 2013. Meiotic recombination initiation  
1047 in and around retrotransposable elements in *Saccharomyces cerevisiae*. *PLoS Genet* **9**:  
1048 e1003732.
- 1049 Saze H, Mittelsten Scheid O, Paszkowski J. 2003. Maintenance of CpG methylation is  
1050 essential for epigenetic inheritance during plant gametogenesis. *Nat Genet* **34**: 65–9.
- 1051 Segal E, Widom J. 2009. Poly(dA:dT) tracts: major determinants of nucleosome organization.  
1052 *Curr Opin Struct Biol* **19**: 65–71.
- 1053 Shi J, Wolf SE, Burke JM, Presting GG, Ross-Ibarra J, Dawe RK. 2010. Widespread gene  
1054 conversion in centromere cores. *PLoS Biol* **8**: e1000327.
- 1055 Shilo S, Melamed-Bessudo C, Dorone Y, Barkai N, Levy AA. 2015. DNA Crossover Motifs  
1056 Associated with Epigenetic Modifications Delineate Open Chromatin Regions in  
1057 *Arabidopsis*. *Plant Cell* **27**: tpc.15.00391.
- 1058 Silverstein KAT, Graham MA, Paape TD, VandenBosch KA. 2005. Genome organization of  
1059 more than 300 defensin-like genes in *Arabidopsis*. *Plant Physiol* **138**: 600–10.
- 1060 Singhal S, Leffler EM, Sannareddy K, Turner I, Venn O, Hooper DM, Strand AI, Li Q, Raney  
1061 B, Balakrishnan CN, et al. 2015. Stable recombination hotspots in birds. *Science (80-)*  
1062 **350**: 928–932.
- 1063 Slotkin RK, Martienssen R. 2007. Transposable elements and the epigenetic regulation of  
1064 the genome. *Nat Rev Genet* **8**: 272–85.
- 1065 Sommermeyer V, Béneut C, Chaplais E, Serrentino ME, Borde V. 2013. Spp1, a member of  
1066 the Set1 Complex, promotes meiotic DSB formation in promoters by tethering histone  
1067 H3K4 methylation sites to chromosome axes. *Mol Cell* **49**: 43–54.
- 1068 Stroud H, Greenberg MVC, Feng S, Bernatavichute Y V, Jacobsen SE. 2013.  
1069 Comprehensive analysis of silencing mutants reveals complex regulation of the  
1070 *Arabidopsis* methylome. *Cell* **152**: 352–64.
- 1071 Stuart T, Eichten S, Cahn J, Karpievitch Y, Borevitz J, Lister R. 2016. Population scale  
1072 mapping of transposable element diversity reveals links to gene regulation and  
1073 epigenomic variation. *Elife* **5**.

- 1074 Székvölgyi L, Ohta K, Nicolas A. 2015. Initiation of Meiotic Homologous Recombination:  
1075 Flexibility, Impact of Histone Modifications, and Chromatin Remodeling. *Cold Spring*  
1076 *Harb Perspect Biol* **7**: a016527.
- 1077 Szostak JW, Orr-Weaver TL, Rothstein RJ, Stahl FW. 1983. The double-strand-break repair  
1078 model for recombination. *Cell* **33**: 25–35.
- 1079 Tischfield SE, Keeney S. 2012. Scale matters: the spatial correlation of yeast meiotic DNA  
1080 breaks with histone H3 trimethylation is driven largely by independent colocalization at  
1081 promoters. *Cell Cycle* **11**: 1496–503.
- 1082 Van der Biezen EA, Freddie CT, Kahn K, Parker JE, Jones JDG. 2002. Arabidopsis RPP4 is  
1083 a member of the RPP5 multigene family of TIR-NB-LRR genes and confers downy  
1084 mildew resistance through multiple signalling components. *Plant J* **29**: 439–51.
- 1085 Villeneuve AM, Hillers KJ. 2001. Whence meiosis? *Cell* **106**: 647–50.
- 1086 Vincenten N, Kuhl L-M, Lam I, Oke A, Kerr AR, Hochwagen A, Fung J, Keeney S, Vader G,  
1087 Marston AL. 2015. The kinetochore prevents centromere-proximal crossover  
1088 recombination during meiosis. *Elife* **4**.
- 1089 Vrielynck N, Chambon A, Vezon D, Pereira L, Chelysheva L, De Muyt A, Mézard C, Mayer  
1090 C, Grelon M. 2016. A DNA topoisomerase VI-like complex initiates meiotic  
1091 recombination. *Science* **351**: 939–43.
- 1092 Wijnker E, Velikkakam James G, Ding J, Becker F, Klasen JR, Rawat V, Rowan BA, de Jong  
1093 DF, de Snoo CB, Zapata L, et al. 2013. The genomic landscape of meiotic crossovers  
1094 and gene conversions in *Arabidopsis thaliana*. *Elife* **2**: e01426.
- 1095 Wu TC, Lichten M. 1994. Meiosis-induced double-strand break sites determined by yeast  
1096 chromatin structure. *Science* **263**: 515–8.
- 1097 Yandea-Nelson MD, Zhou Q, Yao H, Xu X, Nikolau BJ, Schnable PS. 2005. MuDR  
1098 transposase increases the frequency of meiotic crossovers in the vicinity of a Mu  
1099 insertion in the maize *a1* gene. *Genetics* **169**: 917–29.
- 1100 Yelina NE, Lambing C, Hardcastle TJ, Zhao X, Santos B, Henderson IR. 2015. DNA  
1101 methylation epigenetically silences crossover hot spots and controls chromosomal  
1102 domains of meiotic recombination in *Arabidopsis*. *Genes Dev* **29**: 2183–202.
- 1103 Yelina NE, Ziolkowski PA, Miller N, Zhao X, Kelly KA, Muñoz DF, Mann DJ, Copenhaver GP,  
1104 Henderson IR. 2013. High-throughput analysis of meiotic crossover frequency and  
1105 interference via flow cytometry of fluorescent pollen in *Arabidopsis thaliana*. *Nat Protoc*  
1106 **8**: 2119–2134.
- 1107 Zamudio N, Barau J, Teissandier A, Walter M, Borsos M, Servant N, Bourc'his D. 2015. DNA  
1108 methylation restrains transposons from adopting a chromatin signature permissive for  
1109 meiotic recombination. *Genes Dev* **29**: 1256–70.



1110 Zhang X, Bernatavichute Y V, Cokus S, Pellegrini M, Jacobsen SE. 2009. Genome-wide  
1111 analysis of mono-, di- and trimethylation of histone H3 lysine 4 in *Arabidopsis thaliana*.  
1112 *Genome Biol* **10**: R62.

1113 Ziolkowski PA, Berchowitz LE, Lambing C, Yelina NE, Zhao X, Kelly KA, Choi K, Ziolkowska  
1114 L, June V, Sanchez-Moran E, et al. 2015. Juxtaposition of heterozygosity and  
1115 homozygosity during meiosis causes reciprocal crossover remodeling via interference.  
1116 *Elife* **4**: e03708.

1117

1118 **Supplemental Material**

1119 Supplemental Figures S1–S6

1120 Supplemental Tables S1–S14

1121
